# Supplementary material for: Proteomic Stable Isotope Probing Reveals Biosynthesis Dynamics of Slow Growing Methane Based Microbial Communities
Source: Front Microbiol. 2016 Apr 29;7:563. doi: 10.3389/fmicb.2016.00563 (PMC4850331; doi:10.3389/fmicb.2016.00563)
Supplement: Supplementary file 3 [file DataSheet2.xlsx]

## Sheet: Sheet1
NCBI taxon ID	Organism name
285372	uncultured archaeon GZfos30H9
285393	uncultured archaeon GZfos18H11
285402	uncultured archaeon GZfos9E5
285401	uncultured archaeon GZfos9D8
285356	uncultured archaeon GZfos9D1
285366	uncultured archaeon GZfos9C4
285403	uncultured archaeon GZfos3D4
285371	uncultured archaeon GZfos37D1
285368	uncultured archaeon GZfos37B2
285373	uncultured archaeon GZfos36D8
285404	uncultured archaeon GZfos35D7
285408	uncultured archaeon GZfos35B7
285357	uncultured archaeon GZfos35A2
285375	uncultured archaeon GZfos34H9
285374	uncultured archaeon GZfos34H10
285409	uncultured archaeon GZfos34G5
285405	uncultured archaeon GZfos34A6
285376	uncultured archaeon GZfos33H6
285377	uncultured archaeon GZfos33E1
286720	uncultured archaeon GZfos32G12
285378	uncultured archaeon GZfos32E7
285379	uncultured archaeon GZfos32E4
285369	uncultured archaeon GZfos31B6
285380	uncultured archaeon GZfos29E12
285381	uncultured archaeon GZfos28G7
285358	uncultured archaeon GZfos28B8
285386	uncultured archaeon GZfos27G5
285383	uncultured archaeon GZfos27E7
285384	uncultured archaeon GZfos27E6
285385	uncultured archaeon GZfos27B6
285382	uncultured archaeon GZfos27A8
285389	uncultured archaeon GZfos26G2
285387	uncultured archaeon GZfos26F9
290245	uncultured archaeon GZfos26E7
285388	uncultured archaeon GZfos26D6
285406	uncultured archaeon GZfos26B2
286721	uncultured archaeon GZfos1D1
285390	uncultured archaeon GZfos24D9
285391	uncultured archaeon GZfos23H9
286719	uncultured archaeon GZfos22D9
285392	uncultured archaeon GZfos21B5
290244	uncultured archaeon GZfos1C11
285361	uncultured archaeon GZfos19C8
285365	uncultured archaeon GZfos19C7
285362	uncultured archaeon GZfos19A5
285410	uncultured archaeon GZfos18F2
285411	uncultured archaeon GZfos18C8
285363	uncultured archaeon GZfos18B6
285394	uncultured archaeon GZfos17G11
285395	uncultured archaeon GZfos17F1
285367	uncultured archaeon GZfos17C7
285412	uncultured archaeon GZfos17A3
285396	uncultured archaeon GZfos14B8
285397	uncultured archaeon GZfos13E1
285364	uncultured archaeon GZfos12E2
285370	uncultured archaeon GZfos12E1
285398	uncultured archaeon GZfos11H11
285399	uncultured archaeon GZfos11A10
285400	uncultured archaeon GZfos10C7
693661	Archaeoglobus veneficus SNP6
572480	Arcobacter nitrofigilis DSM 7299
264462	Bdellovibrio bacteriovorus HD100
1069642	Bdellovibrio bacteriovorus str. Tiberius
626418	Burkholderia glumae BGR1
395019	Burkholderia multivorans ATCC 17616
398578	Delftia acidovorans SPH-1
439235	Desulfatibacillum alkenivorans AK-01
880072	Desulfobacca acetoxidans DSM 11109
177437	Desulfobacterium autotrophicum HRM2
577650	Desulfobulbus propionicus DSM 2032
485916	Desulfotomaculum acetoxidans DSM 771
526222	Desulfovibrio salexigens DSM 2638
882	Desulfovibrio vulgaris str. Hildenborough
883	Desulfovibrio vulgaris str. 'Miyazaki F'
573059	Desulfovibrio vulgaris RCH1
391774	Desulfovibrio vulgaris DP4
589924	Ferroglobus placidus DSM 10642
379066	Gemmatimonas aurantiaca T-27
443143	Geobacter sp. M18
443144	Geobacter sp. M21
1085623	Glaciecola nitratireducens FR1064
555778	Halothiobacillus neapolitanus c2
498761	Heliobacterium modesticaldum Ice1
316274	Herpetosiphon aurantiacus DSM 785
156889	Magnetococcus marinus MC-1
313603	Maribacter sp. HTCC2170
304371	Methanocella paludicola SANAE
259564	Methanococcoides burtonii DSM 6242
419665	Methanococcus aeolicus Nankai-3
644295	Methanohalobium evestigatum Z-7303
547558	Methanohalophilus mahii DSM 5219
990316	Methanosaeta concilii GP6
1110509	Methanosaeta harundinacea 6Ac
349307	Methanosaeta thermophila PT
679901	Methanosalsum zhilinae DSM 4017
188937	Methanosarcina acetivorans C2A
269797	Methanosarcina barkeri str. Fusaro
521011	Methanosphaerula palustris E1-9c
323259	Methanospirillum hungatei JF-1
187420	Methanothermobacter thermautotrophicus str. Delta H
420662	Methylibium petroleiphilum PM1
857087	Methylomonas methanica MC09
1032480	Microlunatus phosphovorus NM-1
479431	Nakamurella multipartita DSM 44233
472759	Nitrosococcus halophilus Nc 4
196162	Nocardioides sp. JS614
110319	Nocardioides sp. CF8
452637	Opitutus terrae PB90-1
694427	Paludibacter propionicigenes WB4
318586	Paracoccus denitrificans PD1222
338963	Pelobacter carbinolicus DSM 2380
123214	Persephonella marina EX-H1
530564	Pirellula staleyi DSM 6068
342610	Pseudoalteromonas atlantica T6c
1415630	Pseudomonas sp. TKP
911241	Pseudomonas sp. CF161
911243	Pseudomonas sp. CFII68
1283285	Pseudomonas sp. URIL14HWK12:I7
911244	Pseudomonas sp. CFT9
1387231	Pseudomonas sp. CMAA1215
1144708	Pseudomonas sp. GM41(2012)
1144331	Pseudomonas sp. GM49
1144325	Pseudomonas sp. GM21
1197727	Pseudomonas sp. Ag1
1037911	Pseudomonas fluorescens A506
1114970	Pseudomonas fluorescens F113
205922	Pseudomonas fluorescens Pf0-1
216595	Pseudomonas fluorescens SBW25
383372	Roseiflexus castenholzii DSM 13941
246200	Ruegeria pomeroyi DSS-3
318167	Shewanella frigidimarina NCIMB 400
392499	Sphingomonas wittichii RW1
1283312	Sphingomonas sp. DC-6
1336744	Sphingomonas sp. YL-JM2C
573413	Spirochaeta smaragdinae DSM 11293
563040	Sulfurimonas autotrophica DSM 16294
1218800	Sulfurovum sp. SCGC AAA036-F05
387093	Sulfurovum sp. NBC37-1
335543	Syntrophobacter fumaroxidans MPOB
56780	Syntrophus aciditrophicus SB
377629	Teredinibacter turnerae T7901
273068	Caldanaerobacter subterraneus subsp. tengcongensis MB4
391623	Thermococcus barophilus MP
69014	Thermococcus kodakarensis KOD1
289376	Thermodesulfovibrio yellowstonii DSM 11347
396588	Thioalkalivibrio sulfidiphilus HL-EbGr7
1158183	Thioalkalivibrio sp. ARh5
748652	Thioalkalivibrio sp. ALJ15
396595	Thioalkalivibrio sp. K90mix
292415	Thiobacillus denitrificans ATCC 25259
317025	Thiomicrospira crunogena XCL-2
63186	Zobellia galactanivorans
247634	marine gamma proteobacterium HTCC2148
455488	Anaeromyxobacter dehalogenans 2CP-1
224325	Archaeoglobus fulgidus DSM 4304
572546	Archaeoglobus profundus DSM 5631
204669	Candidatus Koribacter versatilis Ellin345
522306	Candidatus Accumulibacter phosphatis clade IIA str. UW-1
397945	Acidovorax citrulli AAC00-1
176299	Agrobacterium fabrum str. C58
240292	Anabaena variabilis ATCC 29413
290397	Anaeromyxobacter dehalogenans 2CP-C
477974	Candidatus Desulforudis audaxviator MP104C
326427	Chloroflexus aggregans DSM 9485
203119	Ruminiclostridium thermocellum ATCC 27405
637887	Ruminiclostridium thermocellum DSM 1313
96561	Desulfococcus oleovorans Hxd3
177439	Desulfotalea psychrophila LSv54
355276	Leptospira borgpetersenii serovar Hardjo-bovis str. L550
436308	Nitrosopumilus maritimus SCM1
323848	Nitrosospira multiformis ATCC 25196
1283287	Nocardioides sp. Iso805N
521674	Planctomyces limnophilus DSM 3776
1234380	Propionibacterium acnes C1
267747	Propionibacterium acnes KPA171202
1091045	Propionibacterium acnes ATCC 11828
1134454	Propionibacterium acnes HL096PA1
1031709	Propionibacterium acnes 6609
909952	Propionibacterium acnes 266
1114966	Propionibacterium acnes TypeIA2 P.acn33
1114967	Propionibacterium acnes TypeIA2 P.acn17
1114969	Propionibacterium acnes TypeIA2 P.acn31
553199	Propionibacterium acnes SK137
357804	Psychromonas ingrahamii 37
765869	Bdellovibrio bacteriovorus W
985079	Burkholderia multivorans ATCC BAA-247
985078	Burkholderia multivorans CF2
513053	Burkholderia multivorans CGD2M
513052	Burkholderia multivorans CGD2
513051	Burkholderia multivorans CGD1
1392998	Candidatus Methanoperedens nitroreducens
1349417	Ruminiclostridium thermocellum BC1
1138384	Ruminiclostridium thermocellum AD2
1094188	Ruminiclostridium thermocellum YS
492476	Ruminiclostridium thermocellum JW20
572545	Ruminiclostridium thermocellum DSM 2360
883100	Delftia acidovorans CCUG 15835
883101	Delftia acidovorans CCUG 274B
314345	Mariprofundus ferrooxydans PV-1
1026882	Methylophaga aminisulfidivorans MP
115547	uncultured archaeon
320771	Pedosphaera parvula Ellin514
344747	Planctomyces maris DSM 8797
1302241	Propionibacterium acnes JCM 18909
1302244	Propionibacterium acnes JCM 18920
1302242	Propionibacterium acnes JCM 18916
1302243	Propionibacterium acnes JCM 18918
1292039	Propionibacterium acnes P6
1292038	Propionibacterium acnes PA2
1226748	Propionibacterium acnes HL042PA3
765090	Propionibacterium acnes HL025PA2
765065	Propionibacterium acnes HL020PA1
765081	Propionibacterium acnes HL087PA1
765088	Propionibacterium acnes HL083PA2
765086	Propionibacterium acnes HL092PA1
765083	Propionibacterium acnes HL087PA3
765072	Propionibacterium acnes HL043PA1
765104	Propionibacterium acnes HL030PA2
765103	Propionibacterium acnes HL030PA1
765101	Propionibacterium acnes HL050PA2
765094	Propionibacterium acnes HL046PA1
765092	Propionibacterium acnes HL059PA2
765085	Propionibacterium acnes HL038PA1
765084	Propionibacterium acnes HL060PA1
765080	Propionibacterium acnes HL110PA4
765074	Propionibacterium acnes HL072PA1
765117	Propionibacterium acnes HL002PA3
765112	Propionibacterium acnes HL027PA2
765071	Propionibacterium acnes HL078PA1
765067	Propionibacterium acnes HL053PA2
765098	Propionibacterium acnes HL005PA3
765097	Propionibacterium acnes HL005PA2
765096	Propionibacterium acnes HL005PA1
765079	Propionibacterium acnes HL110PA3
765075	Propionibacterium acnes HL072PA2
765068	Propionibacterium acnes HL045PA1
765066	Propionibacterium acnes HL053PA1
765124	Propionibacterium [acnes] HL037PA3
765122	Propionibacterium acnes HL037PA1
765121	Propionibacterium acnes HL082PA2
765120	Propionibacterium acnes HL082PA1
765116	Propionibacterium acnes HL002PA2
765115	Propionibacterium acnes HL002PA1
765111	Propionibacterium acnes HL027PA1
765110	Propionibacterium acnes HL067PA1
765109	Propionibacterium [acnes] HL044PA1
765108	Propionibacterium acnes HL036PA3
765105	Propionibacterium acnes HL001PA1
765102	Propionibacterium acnes HL050PA3
765100	Propionibacterium acnes HL050PA1
765099	Propionibacterium acnes HL005PA4
765093	Propionibacterium acnes HL086PA1
765123	Propionibacterium [acnes] HL037PA2
765119	Propionibacterium acnes HL056PA1
765118	Propionibacterium acnes HL007PA1
765114	Propionibacterium acnes HL063PA2
765113	Propionibacterium acnes HL063PA1
765107	Propionibacterium acnes HL036PA2
765106	Propionibacterium acnes HL036PA1
765095	Propionibacterium acnes HL046PA2
765091	Propionibacterium acnes HL059PA1
765089	Propionibacterium acnes HL025PA1
765087	Propionibacterium acnes HL083PA1
765082	Propionibacterium acnes HL087PA2
765078	Propionibacterium acnes HL110PA2
765077	Propionibacterium acnes HL110PA1
765076	Propionibacterium acnes HL074PA1
765069	Propionibacterium acnes HL013PA1
765064	Propionibacterium acnes HL097PA1
765057	Propionibacterium acnes HL096PA3
765058	Propionibacterium acnes HL096PA2
765061	Propionibacterium acnes HL103PA1
686659	Propionibacterium acnes SK187
679195	Propionibacterium acnes J165
679194	Propionibacterium acnes J139
1276649	Propionibacterium acnes FZ1/2/0
1136877	Propionibacterium acnes PRP-38
1051006	Propionibacterium acnes SK182B-JCVI
679193	Propionibacterium acnes SK182
765063	Propionibacterium acnes HL099PA1
1042209	Pseudomonas fluorescens HK44
463794	Pseudomonas fluorescens BBc6R8
1390371	Pseudomonas fluorescens EGD-AQ6
1205750	Pseudomonas fluorescens BRIP34879
1038922	Pseudomonas fluorescens Q2-87
746360	Pseudomonas fluorescens WH6
1165841	Sulfurovum sp. AR
1388761	Caldanaerobacter subterraneus subsp. yonseiensis KB-1
768671	Thiocapsa marina 5811
765914	Thiorhodospira sibirica ATCC 700588
262489	delta proteobacterium MLMS-1
88274	delta proteobacterium NaphS2
285360	uncultured archaeon GZfos23H7
285359	uncultured archaeon GZfos26D8
1541959	Mollicutes bacterium HR1
1541960	Mollicutes bacterium HR2
