# Supplementary material for: Proteomic Stable Isotope Probing Reveals Biosynthesis Dynamics of Slow Growing Methane Based Microbial Communities
Source: Front Microbiol. 2016 Apr 29;7:563. doi: 10.3389/fmicb.2016.00563 (PMC4850331; doi:10.3389/fmicb.2016.00563)
Supplement: Supplementary file 4 [file DataSheet3.xlsx]

## Sheet: SDF 3a
Supplementary Data File 3a) Relative abundance of OTUs identified by 16S rRNA gene tag sequencing.
	0 days	326 days	170 days
Taxon	#3731	#3731 T2	#5133
Archaea;__Ancient_Archaeal_Group(AAG);__c;__o;__f;__g	0.00101719	0.00130794	0.000282016
Archaea;__Euryarchaeota;__Halobacteria;__Halobacteriales;__Deep_Sea_Euryarchaeotic_Group(DSEG);__g	0.00110022	0.00126205	0.000141008
Archaea;__Euryarchaeota;__Halobacteria;__Halobacteriales;__Deep_Sea_Hydrothermal_Vent_Gp_6(DHVEG-6);__Candidatus_Parvarchaeum	0.0134518	0.0146856	0.0345751
Archaea;__Euryarchaeota;__Halobacteria;__Halobacteriales;__Deep_Sea_Hydrothermal_Vent_Gp_6(DHVEG-6);__g	0.00685045	0.00738871	0.00778364
Archaea;__Euryarchaeota;__Halobacteria;__Halobacteriales;__Deep_Sea_Hydrothermal_Vent_Gp_6(DHVEG-6);Other	0.000269866	0.00043598	0.000564032
Archaea;__Euryarchaeota;__Halobacteria;__Halobacteriales;__Marine_Hydrothermal_Vent_Group(MHVG);__g	0.00336295	0.00380909	0.00152289
Archaea;__Euryarchaeota;__Halobacteria;__Halobacteriales;__Miscellaneous_Euryarchaeotic_Group(MEG);__g	0.000103795	0.000252409	0.000225613
Archaea;__Euryarchaeota;__Halobacteria;__Halobacteriales;__SM1K20;__g	0.00195134	0.00259293	0.00107166
Archaea;__Euryarchaeota;__Methanomicrobia;__ANME-1;__ANME-1a;__g	0.0700407	0.0791877	0.0305141
Archaea;__Euryarchaeota;__Methanomicrobia;__ANME-1;__ANME-1b;__g	0.0638545	0.0369665	0.0494938
Archaea;__Euryarchaeota;__Methanomicrobia;__ANME-1;Other;Other	0.00583326	0.00571363	0.0119011
Archaea;__Euryarchaeota;__Methanomicrobia;__Methanomicrobiales;__Methanomicrobiaceae;__Methanogenium	0	2.29463e-05	0
Archaea;__Euryarchaeota;__Methanomicrobia;__Methanosarcinales;__ANME-2a-2b;__ANME-2b	0.0164203	0.0187012	0.0155391
Archaea;__Euryarchaeota;__Methanomicrobia;__Methanosarcinales;__ANME-2a-2b;__g	0.0059163	0.00849013	0.00470966
Archaea;__Euryarchaeota;__Methanomicrobia;__Methanosarcinales;__ANME-2a-2b;Other	8.30358e-05	0	0
Archaea;__Euryarchaeota;__Methanomicrobia;__Methanosarcinales;__ANME-2c;__g	0.00927925	0.0102799	0.00606334
Archaea;__Euryarchaeota;__Methanomicrobia;__Methanosarcinales;__GOM_Arc_I;__g	4.15179e-05	6.88389e-05	0
Archaea;__Euryarchaeota;__Methanomicrobia;__Methanosarcinales;__Methanosaetaceae;__Methanosaeta	6.22768e-05	9.17852e-05	0
Archaea;__Euryarchaeota;__Methanomicrobia;__Methanosarcinales;__Methanosarcinaceae;__ANME-3	6.22768e-05	4.58926e-05	0.000112806
Archaea;__Euryarchaeota;__Methanomicrobia;__Methanosarcinales;__Methanosarcinaceae;__Methanococcoides	2.07589e-05	0	2.82016e-05
Archaea;__Euryarchaeota;__Methanomicrobia;__Methanosarcinales;__Methanosarcinaceae;Other	0	0	0.000141008
Archaea;__Euryarchaeota;__Methanomicrobia;__Methanosarcinales;Other;Other	0	4.58926e-05	0
Archaea;__Euryarchaeota;__Methanomicrobia;Other;Other;Other	0	9.17852e-05	2.82016e-05
Archaea;__Euryarchaeota;__Thermoplasmata;__19c-33;__f;__g	0	0	2.82016e-05
Archaea;__Euryarchaeota;__Thermoplasmata;__Fe-A-9;__f;__g	0.000186831	0.000137678	0.000141008
Archaea;__Euryarchaeota;__Thermoplasmata;__South_African_Goldmine_Gp(SAGMEG);__f;__g	2.07589e-05	6.88389e-05	0
Archaea;__Euryarchaeota;__Thermoplasmata;__Thermoplasmatales;__20c-4;__g	0	2.29463e-05	0
Archaea;__Euryarchaeota;__Thermoplasmata;__Thermoplasmatales;__AMOS1A-4113-D04;__g	0.000726563	0.000917852	0.00132547
Archaea;__Euryarchaeota;__Thermoplasmata;__Thermoplasmatales;__ANT06-05;__g	0.000539733	0.000642497	5.64032e-05
Archaea;__Euryarchaeota;__Thermoplasmata;__Thermoplasmatales;__CCA47;__g	0.000871876	0.00119321	0.00194591
Archaea;__Euryarchaeota;__Thermoplasmata;__Thermoplasmatales;__Marine_Benthic_Group_D_and_DHVEG-1;__g	0.0270697	0.0333869	0.018613
Archaea;__Euryarchaeota;__Thermoplasmata;__Thermoplasmatales;__Terrestrial_Miscellaneous_Gp(TMEG);__g	2.07589e-05	2.29463e-05	0
Archaea;__Euryarchaeota;__Thermoplasmata;__Thermoplasmatales;__VC2.1_Arc6;__g	0.000332143	0.000665443	0.00141008
Archaea;__Euryarchaeota;__Thermoplasmata;__Thermoplasmatales;Other;Other	0.000498215	0.000573658	0.00366621
Archaea;__Euryarchaeota;Other;Other;Other;Other	0	6.88389e-05	0.000141008
Archaea;__p;__c;__o;__f;__g	0.000332143	0.000137678	2.82016e-05
Archaea;__Thaumarchaeota;__Group_C3;__o;__f;__g	6.22768e-05	0.000206517	0
Archaea;__Thaumarchaeota;__Marine_Benthic_Group_B;__o;__f;__g	0.00213817	0.00275356	0.00149468
Archaea;__Thaumarchaeota;__Marine_Group_I;__o;__f;__g	4.15179e-05	2.29463e-05	0
Archaea;__Thaumarchaeota;__Marine_Group_I;Other;Other;Other	6.22768e-05	2.29463e-05	0
Archaea;__Thaumarchaeota;__Miscellaneous_Crenarchaeotic_Group;__o;__f;__g	0.000186831	4.58926e-05	0
Bacteria;__Acidobacteria;__Acidobacteria;__AT-s3-28;__f;__g	2.07589e-05	0	0
Bacteria;__Acidobacteria;__Acidobacteria;__Subgroup_17;__f;__g	4.15179e-05	2.29463e-05	0
Bacteria;__Acidobacteria;__Acidobacteria;__Subgroup_21;__f;__g	0.000103795	9.17852e-05	0
Bacteria;__Acidobacteria;__Acidobacteria;__Subgroup_3;Other;Other	6.22768e-05	0.000160624	8.46048e-05
Bacteria;__Acidobacteria;__Acidobacteria;__Subgroup_5;__f;__g	2.07589e-05	2.29463e-05	5.64032e-05
Bacteria;__Acidobacteria;__Acidobacteria;__Subgroup_9;__f;__g	0.000124554	4.58926e-05	0
Bacteria;__Acidobacteria;__Acidobacteria;Other;Other;Other	0	2.29463e-05	0
Bacteria;__Acidobacteria;__Holophagae;__Subgroup_10;__Sva0725;__g	0.000518974	0.000321248	8.46048e-05
Bacteria;__Acidobacteria;__Holophagae;__Subgroup_10;Other;Other	4.15179e-05	0	0
Bacteria;__Acidobacteria;__Holophagae;__Subgroup_23;__NKB17;__g	0.00755626	0.00745755	0.00245354
Bacteria;__Acidobacteria;__Holophagae;__Subgroup_23;Other;Other	4.15179e-05	0	0
Bacteria;__Acidobacteria;__Holophagae;__TPD-58;__f;__g	0	0	5.64032e-05
Bacteria;__Acidobacteria;__Holophagae;Other;Other;Other	4.15179e-05	0	8.46048e-05
Bacteria;__Acidobacteria;__Subgroup_22;__o;__f;__g	0.000560492	0.000527765	0.000507629
Bacteria;__Acidobacteria;__Subgroup_26;__o;__f;__g	6.22768e-05	2.29463e-05	5.64032e-05
Bacteria;__Acidobacteria;Other;Other;Other;Other	0.000228348	0.000114732	0.000253814
Bacteria;__Actinobacteria;__Acidimicrobiia;__Acidimicrobiales;__Acidimicrobiaceae;__uncultured	0	0.000114732	0.000112806
Bacteria;__Actinobacteria;__Acidimicrobiia;__Acidimicrobiales;__OCS155_marine_group;__g	0.00884331	0.0052547	0.00456866
Bacteria;__Actinobacteria;__Acidimicrobiia;__Acidimicrobiales;__Sva0996_marine_group;__g	0	2.29463e-05	0
Bacteria;__Actinobacteria;__Acidimicrobiia;__Acidimicrobiales;__uncultured;__g	6.22768e-05	4.58926e-05	2.82016e-05
Bacteria;__Actinobacteria;__Acidimicrobiia;__Acidimicrobiales;Other;Other	8.30358e-05	9.17852e-05	0.000141008
Bacteria;__Actinobacteria;__Actinobacteria;__Corynebacteriales;__Corynebacteriaceae;__Corynebacterium	0	0	2.82016e-05
Bacteria;__Actinobacteria;__Actinobacteria;__Corynebacteriales;__Mycobacteriaceae;__Mycobacterium	4.15179e-05	0	0
Bacteria;__Actinobacteria;__Actinobacteria;__Frankiales;Other;Other	0	2.29463e-05	0
Bacteria;__Actinobacteria;__Actinobacteria;__Micrococcales;__Micrococcaceae;__Arthrobacter	0	2.29463e-05	0
Bacteria;__Actinobacteria;__Coriobacteriia;__Coriobacteriales;__Coriobacteriaceae;__uncultured	0	4.58926e-05	0.000423024
Bacteria;__Actinobacteria;__OPB41;__o;__f;__g	0.00240804	0.0015374	0.00143828
Bacteria;__Actinobacteria;__Thermoleophilia;__Gaiellales;__uncultured;__g	4.15179e-05	0	0
Bacteria;__Actinobacteria;__Thermoleophilia;__Solirubrobacterales;__480-2;__g	2.07589e-05	0	0
Bacteria;__Actinobacteria;Other;Other;Other;Other	0	4.58926e-05	5.64032e-05
Bacteria;__Armatimonadetes;__c;__o;__f;__g	0.00143237	0.00133089	0.000197411
Bacteria;__Bacteroidetes;__Bacteroidia;__Bacteroidales;__Marinilabiaceae;__Marinifilum	0	0	8.46048e-05
Bacteria;__Bacteroidetes;__Bacteroidia;__Bacteroidales;__Marinilabiaceae;__uncultured	0.00209665	0.00254704	0.00865789
Bacteria;__Bacteroidetes;__BD2-2;__o;__f;__g	0.0229594	0.0224185	0.0265941
Bacteria;__Bacteroidetes;__Cytophagia;__Cytophagales;__Flammeovirgaceae;__Reichenbachiella	0.000269866	0.00061955	0.000846048
Bacteria;__Bacteroidetes;__Cytophagia;__Cytophagales;__Flammeovirgaceae;__uncultured	0.000602009	0.000642497	5.64032e-05
Bacteria;__Bacteroidetes;__Cytophagia;__Cytophagales;Other;Other	4.15179e-05	2.29463e-05	0
Bacteria;__Bacteroidetes;__Cytophagia;__Order_II_Incertae_Sedis;__Rhodothermaceae;__Rubricoccus	0	0	5.64032e-05
Bacteria;__Bacteroidetes;__Cytophagia;__Order_II_Incertae_Sedis;__Rhodothermaceae;__uncultured	6.22768e-05	4.58926e-05	8.46048e-05
Bacteria;__Bacteroidetes;__Cytophagia;__Order_II_Incertae_Sedis;__Rhodothermaceae;Other	2.07589e-05	2.29463e-05	5.64032e-05
Bacteria;__Bacteroidetes;__Flavobacteria;__Flavobacteriales;__Cryomorphaceae;__Crocinitomix	0	0	0.000141008
Bacteria;__Bacteroidetes;__Flavobacteria;__Flavobacteriales;__Cryomorphaceae;__Owenweeksia	0	4.58926e-05	5.64032e-05
Bacteria;__Bacteroidetes;__Flavobacteria;__Flavobacteriales;__Cryomorphaceae;Other	2.07589e-05	9.17852e-05	0.000282016
Bacteria;__Bacteroidetes;__Flavobacteria;__Flavobacteriales;__Flavobacteriaceae;__Maritimimonas	0.000996429	0.000780174	0.00369441
Bacteria;__Bacteroidetes;__Flavobacteria;__Flavobacteriales;__Flavobacteriaceae;__uncultured	0.000913394	0.00117026	0.0312474
Bacteria;__Bacteroidetes;__Flavobacteria;__Flavobacteriales;__Flavobacteriaceae;Other	0.000851117	0.000390087	0.00473787
Bacteria;__Bacteroidetes;__Flavobacteria;__Flavobacteriales;Other;Other	0	0	5.64032e-05
Bacteria;__Bacteroidetes;__SB-1;__o;__f;__g	0.000352902	0.000849013	0.00310217
Bacteria;__Bacteroidetes;__SB-5;__o;__f;__g	0.00120402	0.00169803	0.00431484
Bacteria;__Bacteroidetes;__Sphingobacteriia;__Sphingobacteriales;__Chitinophagaceae;__uncultured	0	0	0.000112806
Bacteria;__Bacteroidetes;__Sphingobacteriia;__Sphingobacteriales;__NS11-12_marine_group;__g	0	0	8.46048e-05
Bacteria;__Bacteroidetes;__Sphingobacteriia;__Sphingobacteriales;__PHOS-HE51;__g	0	0	2.82016e-05
Bacteria;__Bacteroidetes;__Sphingobacteriia;__Sphingobacteriales;__Saprospiraceae;__Portibacter	0	0	5.64032e-05
Bacteria;__Bacteroidetes;__Sphingobacteriia;__Sphingobacteriales;__Saprospiraceae;__uncultured	0.000124554	9.17852e-05	0.000282016
Bacteria;__Bacteroidetes;__Sphingobacteriia;__Sphingobacteriales;__Saprospiraceae;Other	6.22768e-05	2.29463e-05	0.000564032
Bacteria;__Bacteroidetes;__Sphingobacteriia;__Sphingobacteriales;__ST-12K33;__g	2.07589e-05	4.58926e-05	0.000253814
Bacteria;__Bacteroidetes;__Sphingobacteriia;__Sphingobacteriales;__WCHB1-69;__g	0.0101926	0.010693	0.0221382
Bacteria;__Bacteroidetes;__Sphingobacteriia;__Sphingobacteriales;Other;Other	0.00178527	0.00162919	0.00287656
Bacteria;__Bacteroidetes;__vadinHA17;__o;__f;__g	0.000145313	6.88389e-05	0.000112806
Bacteria;__Bacteroidetes;__VC2.1_Bac22;__o;__f;__g	0.000664286	0.00105553	0.0111114
Bacteria;__Bacteroidetes;Other;Other;Other;Other	0.00666362	0.00741166	0.0164697
Bacteria;__BD1-5;__c;__o;__f;__g	0.00105871	0.00110142	0.00203051
Bacteria;__BHI80-139;__c;__o;__f;__g	0.000747322	0.000527765	0.000282016
Bacteria;__Caldiserica;__Caldisericia;__Caldisericales;__LF045;__g	0	2.29463e-05	0
Bacteria;__Candidate_division_BRC1;__c;__o;__f;__g	8.30358e-05	0.000367141	0.000197411
Bacteria;__Candidate_division_JS1;__c;__o;__f;__g	0.0240389	0.0223726	0.0168081
Bacteria;__Candidate_division_OD1;__c;__o;__f;__g	0.00867724	0.00890317	0.011196
Bacteria;__Candidate_division_OP11;__c;__o;__f;__g	0.00163996	0.00185865	0.00166389
Bacteria;__Candidate_division_OP3;__c;__o;__f;__g	0.00865648	0.00993575	0.00256634
Bacteria;__Candidate_division_OP8;__c;__o;__f;__g	0.00826206	0.00686095	0.00242534
Bacteria;__Candidate_division_SR1;__c;__o;__f;__g	0.000166072	0.000367141	0.000338419
Bacteria;__Candidate_division_WS3;__c;__o;__f;__g	0.0105871	0.0108077	0.0131137
Bacteria;__Chlamydiae;__Chlamydiae;__Chlamydiales;__cvE6;__g	2.07589e-05	0	0
Bacteria;__Chlamydiae;__Chlamydiae;__Chlamydiales;__Parachlamydiaceae;Other	2.07589e-05	2.29463e-05	5.64032e-05
Bacteria;__Chlamydiae;__Chlamydiae;__Chlamydiales;__Simkaniaceae;__Candidatus_Rhabdochlamydia	0.000124554	0	0
Bacteria;__Chlamydiae;__Chlamydiae;__Chlamydiales;__Simkaniaceae;Other	6.22768e-05	2.29463e-05	0
Bacteria;__Chlamydiae;__Chlamydiae;__Chlamydiales;__WA-aaa01f12;__g	8.30358e-05	4.58926e-05	0.000282016
Bacteria;__Chlamydiae;__Chlamydiae;__Chlamydiales;Other;Other	0.000477456	0.000252409	0
Bacteria;__Chlorobi;__Chlorobia;__Chlorobiales;__OPB56;__g	0.000166072	0.000206517	0.000761443
Bacteria;__Chlorobi;__Chlorobia;__Chlorobiales;__SJA-28;__g	0.000954912	0.00117026	0.00129727
Bacteria;__Chlorobi;__Ignavibacteria;__Ignavibacteriales;__BSV26;__g	2.07589e-05	9.17852e-05	0
Bacteria;__Chlorobi;__Ignavibacteria;__Ignavibacteriales;__Ignavibacteriaceae;__Ignavibacterium	0.000124554	0.000114732	0
Bacteria;__Chlorobi;__Ignavibacteria;__Ignavibacteriales;__IheB3-7;__g	0.000539733	0.000504819	0.00265095
Bacteria;__Chlorobi;__Ignavibacteria;__Ignavibacteriales;__PHOS-HE36;__g	0.00188906	0.00172097	0.00135368
Bacteria;__Chlorobi;__Ignavibacteria;__Ignavibacteriales;Other;Other	0.000726563	0.00100964	0.000507629
Bacteria;__Chloroflexi;__Anaerolineae;__Anaerolineales;__Anaerolineaceae;__uncultured	0.089222	0.0623451	0.0401591
Bacteria;__Chloroflexi;__Anaerolineae;__Anaerolineales;__Anaerolineaceae;Other	0.00280246	0.00316659	0.00141008
Bacteria;__Chloroflexi;__Caldilineae;__Caldilineales;__Caldilineaceae;__uncultured	0.0024288	0.00146856	0.0017767
Bacteria;__Chloroflexi;__Dehalococcoidia;__FW22;__f;__g	4.15179e-05	0.000160624	0
Bacteria;__Chloroflexi;__Dehalococcoidia;__GIF3;__f;__g	0.000415179	0.000481872	0
Bacteria;__Chloroflexi;__Dehalococcoidia;__GIF9;__f;__g	0.000249107	0.000344195	0
Bacteria;__Chloroflexi;__Dehalococcoidia;__MSBL5;__f;__g	0.00581251	0.00585131	2.82016e-05
Bacteria;__Chloroflexi;__Dehalococcoidia;__Napoli-4B-65;__f;__g	0.000726563	0.000917852	0
Bacteria;__Chloroflexi;__Dehalococcoidia;__Sh765B-AG-111;__f;__g	8.30358e-05	4.58926e-05	0
Bacteria;__Chloroflexi;__Dehalococcoidia;__vadinBA26;__f;__g	0.000290625	0.000298302	0
Bacteria;__Chloroflexi;__Dehalococcoidia;Other;Other;Other	0.00413103	0.00422212	0.000648636
Bacteria;__Chloroflexi;__KD4-96;__o;__f;__g	0	2.29463e-05	0.000141008
Bacteria;__Chloroflexi;__Thermomicrobia;__AKYG1722;__f;__g	0	4.58926e-05	0
Bacteria;__Chloroflexi;Other;Other;Other;Other	0.0039442	0.00348784	0.00284836
Bacteria;__Cyanobacteria;__4C0d-2;__o;__f;__g	0.000415179	0.000229463	2.82016e-05
Bacteria;__Cyanobacteria;__Chloroplast;__o;__f;__g	2.07589e-05	6.88389e-05	0.000253814
Bacteria;__Cyanobacteria;__Cyanobacteria;__SubsectionI;__FamilyI;__Synechococcus	2.07589e-05	0	0
Bacteria;__Cyanobacteria;__ML635J-21;__o;__f;__g	8.30358e-05	0.000114732	2.82016e-05
Bacteria;__Cyanobacteria;__SHA-109;__o;__f;__g	0.000103795	9.17852e-05	0
Bacteria;__Deferribacteres;__Deferribacteres;__Deferribacterales;__Family_Incertae_Sedis;__Caldithrix	0.0178319	0.0192061	0.0145802
Bacteria;__Deferribacteres;__Deferribacteres;__Deferribacterales;__LCP-89;__g	0.00107947	0.00135383	0.000225613
Bacteria;__Deferribacteres;__Deferribacteres;__Deferribacterales;__PAUC34f;__g	0.000145313	0.000344195	0.000225613
Bacteria;__Deferribacteres;__Deferribacteres;__Deferribacterales;__SAR406_clade(Marine_group_A);__g	0.00220045	0.00263883	0.0089117
Bacteria;__Deferribacteres;__Deferribacteres;__Deferribacterales;Other;Other	8.30358e-05	0.000114732	0.000141008
Bacteria;__Deinococcus-Thermus;__Deinococci;__KD3-62;__f;__g	2.07589e-05	2.29463e-05	0
Bacteria;__Elusimicrobia;__Elusimicrobia;__Lineage_I_(Endomicrobia);__f;__g	2.07589e-05	0.000160624	0.000112806
Bacteria;__Elusimicrobia;__Elusimicrobia;__Lineage_IIa;__f;__g	0.000103795	2.29463e-05	0
Bacteria;__Elusimicrobia;__Elusimicrobia;__Lineage_IIb;__f;__g	4.15179e-05	0.000114732	5.64032e-05
Bacteria;__Elusimicrobia;__Elusimicrobia;__Lineage_IV;__f;__g	0.000103795	6.88389e-05	0.00124087
Bacteria;__Elusimicrobia;__Elusimicrobia;__MD2894-B20;__f;__g	4.15179e-05	0	0
Bacteria;__Elusimicrobia;__Elusimicrobia;__MVP-88;__f;__g	2.07589e-05	2.29463e-05	0
Bacteria;__Elusimicrobia;__Elusimicrobia;__o;__f;__g	0.00147389	0.0015374	0.000282016
Bacteria;__Elusimicrobia;__Elusimicrobia;__Rs-M47;__f;__g	8.30358e-05	0.000252409	0.000366621
Bacteria;__Elusimicrobia;__Elusimicrobia;Other;Other;Other	0.000602009	0.000688389	0.00138188
Bacteria;__Fibrobacteres;__Fibrobacteria;__Fibrobacterales;__Fibrobacteraceae;__uncultured	0	0	8.46048e-05
Bacteria;__Fibrobacteres;__Fibrobacteria;__Fibrobacterales;Other;Other	0.000186831	0.000275356	0
Bacteria;__Fibrobacteres;__Fibrobacteria;__possible_order_07;__f;__g	0.00201362	0.00227168	0.00321498
Bacteria;__Firmicutes;__Bacilli;__Bacillales;__Bacillaceae;__Bacillus	0.000103795	2.29463e-05	0
Bacteria;__Firmicutes;__Bacilli;__Bacillales;__Paenibacillaceae;__Brevibacillus	4.15179e-05	0	0
Bacteria;__Firmicutes;__Bacilli;__Bacillales;__Staphylococcaceae;__Staphylococcus	0	2.29463e-05	0
Bacteria;__Firmicutes;__Bacilli;__Bacillales;Other;Other	2.07589e-05	0	0
Bacteria;__Firmicutes;__Clostridia;__Clostridiales;__Christensenellaceae;__uncultured	0.000249107	0.000298302	0.000197411
Bacteria;__Firmicutes;__Clostridia;__Clostridiales;__Christensenellaceae;Other	0	0	8.46048e-05
Bacteria;__Firmicutes;__Clostridia;__Clostridiales;__Clostridiaceae;__Clostridium	6.22768e-05	0	0
Bacteria;__Firmicutes;__Clostridia;__Clostridiales;__Eubacteriaceae;__Eubacterium	0.000207589	0.000298302	0.00016921
Bacteria;__Firmicutes;__Clostridia;__Clostridiales;__Family_Incertae_Sedis;__Dethiosulfatibacter	0	0.00018357	0.000366621
Bacteria;__Firmicutes;__Clostridia;__Clostridiales;__Family_XII_Incertae_Sedis;__Fusibacter	0.00226273	0.0168885	0.00265095
Bacteria;__Firmicutes;__Clostridia;__Clostridiales;__Family_XII_Incertae_Sedis;Other	2.07589e-05	4.58926e-05	0.000225613
Bacteria;__Firmicutes;__Clostridia;__Clostridiales;__Family_XIII_Incertae_Sedis;Other	6.22768e-05	0.000298302	0.00109986
Bacteria;__Firmicutes;__Clostridia;__Clostridiales;__Lachnospiraceae;__Incertae_Sedis	0.000103795	6.88389e-05	0
Bacteria;__Firmicutes;__Clostridia;__Clostridiales;__Lachnospiraceae;__uncultured	0.000145313	0.000137678	8.46048e-05
Bacteria;__Firmicutes;__Clostridia;__Clostridiales;__Lachnospiraceae;Other	0	2.29463e-05	0
Bacteria;__Firmicutes;__Clostridia;__Clostridiales;__Peptococcaceae;__uncultured	0.000103795	4.58926e-05	0.00016921
Bacteria;__Firmicutes;__Clostridia;__Clostridiales;__Peptococcaceae;Other	0	0	0.000141008
Bacteria;__Firmicutes;__Clostridia;__Clostridiales;__Ruminococcaceae;__uncultured	0.000809599	0.000504819	0.00276376
Bacteria;__Firmicutes;__Clostridia;__Clostridiales;__Ruminococcaceae;Other	4.15179e-05	2.29463e-05	0.000112806
Bacteria;__Firmicutes;__Clostridia;__Clostridiales;__Syntrophomonadaceae;__Candidatus_Contubernalis	0	6.88389e-05	0
Bacteria;__Firmicutes;__Clostridia;__Clostridiales;Other;Other	0.00157768	0.00858192	0.000338419
Bacteria;__Firmicutes;__Clostridia;__Halanaerobiales;__64K2;__g	0.00039442	0.00112437	0.000141008
Bacteria;__Firmicutes;__OPB54;__o;__f;__g	2.07589e-05	0	0
Bacteria;__Firmicutes;Other;Other;Other;Other	0	0	2.82016e-05
Bacteria;__Fusobacteria;__Fusobacteriia;__Fusobacteriales;__Fusobacteriaceae;__Psychrilyobacter	0.000664286	0.030335	0.00248174
Bacteria;__Fusobacteria;__Fusobacteriia;__Fusobacteriales;__Leptotrichiaceae;__uncultured	2.07589e-05	0	0
Bacteria;__Fusobacteria;__Fusobacteriia;__MSBL6;__f;__g	8.30358e-05	0.000114732	0.000366621
Bacteria;__Gemmatimonadetes;__Gemmatimonadetes;__BD2-11_terrestrial_group;__f;__g	0.000332143	0.000321248	8.46048e-05
Bacteria;__Gemmatimonadetes;__Gemmatimonadetes;__Gemmatimonadales;__Gemmatimonadaceae;__uncultured	6.22768e-05	0.000114732	0.00016921
Bacteria;__Gemmatimonadetes;__Gemmatimonadetes;__PAUC43f_marine_benthic_group;__f;__g	0.00249107	0.00229463	0.000112806
Bacteria;__GOUTA4;__c;__o;__f;__g	0.000249107	0.000321248	0.000282016
Bacteria;__Hyd24-12;__c;__o;__f;__g	0.00145313	0.00137678	0.0017767
Bacteria;__JL-ETNP-Z39;__c;__o;__f;__g	0.000103795	0.00018357	0.000112806
Bacteria;__Kazan-3B-28;__c;__o;__f;__g	0	4.58926e-05	0
Bacteria;__LD1-PA38;__c;__o;__f;__g	0	0	2.82016e-05
Bacteria;__Lentisphaerae;__Lentisphaeria;__BS5;__f;__g	6.22768e-05	2.29463e-05	8.46048e-05
Bacteria;__Lentisphaerae;__Lentisphaeria;__LD1-PB3;__f;__g	2.07589e-05	0	0
Bacteria;__Lentisphaerae;__Lentisphaeria;__R76-B128;__f;__g	0.000103795	0.000160624	2.82016e-05
Bacteria;__Lentisphaerae;__Lentisphaeria;__Victivallales;__Victivallaceae;__uncultured	0.000352902	0.000114732	0.000366621
Bacteria;__Lentisphaerae;__Lentisphaeria;__WCHB1-41;__f;__g	0.000207589	0.000298302	0.000310217
Bacteria;__Lentisphaerae;__Lentisphaeria;Other;Other;Other	0.000975671	0.000206517	0.000507629
Bacteria;__Nitrospirae;__Nitrospira;__Nitrospirales;__40296;__g	0.00188906	0.00190454	0.000564032
Bacteria;__Nitrospirae;__Nitrospira;__Nitrospirales;__Family_Incertae_Sedis;__Candidatus_Methylomirabilis	0	2.29463e-05	0
Bacteria;__Nitrospirae;__Nitrospira;__Nitrospirales;__Nitrospiraceae;__Nitrospira	2.07589e-05	0	0
Bacteria;__Nitrospirae;__Nitrospira;__Nitrospirales;__Nitrospiraceae;__uncultured	8.30358e-05	0.000137678	0.00132547
Bacteria;__NPL-UPA2;__c;__o;__f;__g	0.00137009	0.0015374	0.000648636
Bacteria;__Planctomycetes;__MBMPE71;__o;__f;__g	2.07589e-05	0	0
Bacteria;__Planctomycetes;__MD2896-B258;__o;__f;__g	4.15179e-05	9.17852e-05	2.82016e-05
Bacteria;__Planctomycetes;__OM190;__o;__f;__g	0.000581251	0.000940799	0.0017485
Bacteria;__Planctomycetes;__Phycisphaerae;__CCM11a;__f;__g	0.000269866	0.000344195	0.000282016
Bacteria;__Planctomycetes;__Phycisphaerae;__ML-A-10;__f;__g	0	0	5.64032e-05
Bacteria;__Planctomycetes;__Phycisphaerae;__mle1-8;__f;__g	0.000934153	0.000780174	0.00208692
Bacteria;__Planctomycetes;__Phycisphaerae;__MSB-3A7_sediment_group;__f;__g	0.00128705	0.00126205	0.00149468
Bacteria;__Planctomycetes;__Phycisphaerae;__MSBL9;__f;__g	0.00550112	0.00518587	0.00163569
Bacteria;__Planctomycetes;__Phycisphaerae;__Phycisphaerales;__08D2Z94_hypersaline_microbial_mat_group;__g	0.000249107	0.000321248	0.000479427
Bacteria;__Planctomycetes;__Phycisphaerae;__Phycisphaerales;__AKAU3564_sediment_group;__g	8.30358e-05	0.000114732	2.82016e-05
Bacteria;__Planctomycetes;__Phycisphaerae;__Phycisphaerales;__ODP1230B30.02_sediment_group;__g	0.000602009	0.000458926	0.000394822
Bacteria;__Planctomycetes;__Phycisphaerae;__Phycisphaerales;__Phycisphaeraceae;__Phycisphaera	0.000705804	0.000458926	0.000507629
Bacteria;__Planctomycetes;__Phycisphaerae;__Phycisphaerales;__Phycisphaeraceae;__Urania-1B-19_marine_sediment_group	0.000269866	9.17852e-05	0.000225613
Bacteria;__Planctomycetes;__Phycisphaerae;__Phycisphaerales;__Phycisphaeraceae;Other	0.000498215	0.000298302	0.000874249
Bacteria;__Planctomycetes;__Phycisphaerae;__Phycisphaerales;__SBYZ-984;__g	2.07589e-05	4.58926e-05	0
Bacteria;__Planctomycetes;__Phycisphaerae;__Phycisphaerales;Other;Other	0.00363282	0.00339605	0.00197411
Bacteria;__Planctomycetes;__Phycisphaerae;__Pla1_lineage;__f;__g	0.000352902	0.000665443	2.82016e-05
Bacteria;__Planctomycetes;__Phycisphaerae;__SHA-43;__f;__g	0.000332143	0.000527765	0.00016921
Bacteria;__Planctomycetes;__Phycisphaerae;Other;Other;Other	0.00128705	0.00103258	0.000592233
Bacteria;__Planctomycetes;__Pla3_lineage;__o;__f;__g	0.000373661	0.000344195	0.000141008
Bacteria;__Planctomycetes;__Pla4_lineage;__o;__f;__g	0.000228348	4.58926e-05	0.00053583
Bacteria;__Planctomycetes;__Planctomycetacia;__Brocadiales;__Brocadiaceae;__Candidatus_Scalindua	0.000166072	0	8.46048e-05
Bacteria;__Planctomycetes;__Planctomycetacia;__Brocadiales;__Brocadiaceae;__PB79	2.07589e-05	0	5.64032e-05
Bacteria;__Planctomycetes;__Planctomycetacia;__Planctomycetales;__Planctomycetaceae;__Blastopirellula	8.30358e-05	4.58926e-05	0
Bacteria;__Planctomycetes;__Planctomycetacia;__Planctomycetales;__Planctomycetaceae;__Pir4_lineage	0.00110022	0.00061955	0.00141008
Bacteria;__Planctomycetes;__Planctomycetacia;__Planctomycetales;__Planctomycetaceae;__Pirellula	0.000145313	2.29463e-05	0.000112806
Bacteria;__Planctomycetes;__Planctomycetacia;__Planctomycetales;__Planctomycetaceae;__Planctomyces	0.000207589	4.58926e-05	5.64032e-05
Bacteria;__Planctomycetes;__Planctomycetacia;__Planctomycetales;__Planctomycetaceae;__Rhodopirellula	8.30358e-05	0	5.64032e-05
Bacteria;__Planctomycetes;__Planctomycetacia;__Planctomycetales;__Planctomycetaceae;__uncultured	0.00220045	0.000642497	0.000366621
Bacteria;__Planctomycetes;__Planctomycetacia;__Planctomycetales;__Planctomycetaceae;Other	0.000602009	0.000344195	0.000394822
Bacteria;__Planctomycetes;__SGST604;__o;__f;__g	0	0	8.46048e-05
Bacteria;__Planctomycetes;__vadinHA49;__o;__f;__g	0.00157768	0.00195044	0.000987055
Bacteria;__Planctomycetes;Other;Other;Other;Other	0.00118326	0.00144562	0.00107166
Bacteria;__Proteobacteria;__Alphaproteobacteria;__DB1-14;__f;__g	4.15179e-05	2.29463e-05	0.000141008
Bacteria;__Proteobacteria;__Alphaproteobacteria;__OCS116_clade;__f;__g	0.000124554	0.000137678	5.64032e-05
Bacteria;__Proteobacteria;__Alphaproteobacteria;__Rhizobiales;__Hyphomicrobiaceae;__Filomicrobium	0.000145313	2.29463e-05	0
Bacteria;__Proteobacteria;__Alphaproteobacteria;__Rhizobiales;__Hyphomicrobiaceae;__uncultured	0.000373661	0.00043598	0.000394822
Bacteria;__Proteobacteria;__Alphaproteobacteria;__Rhizobiales;__Hyphomicrobiaceae;Other	8.30358e-05	0.000114732	2.82016e-05
Bacteria;__Proteobacteria;__Alphaproteobacteria;__Rhizobiales;__Phyllobacteriaceae;__Ahrensia	0.000373661	0.00043598	0.000846048
Bacteria;__Proteobacteria;__Alphaproteobacteria;__Rhizobiales;__Phyllobacteriaceae;Other	0	0	2.82016e-05
Bacteria;__Proteobacteria;__Alphaproteobacteria;__Rhizobiales;__Rhodobiaceae;__Parvibaculum	0	0	5.64032e-05
Bacteria;__Proteobacteria;__Alphaproteobacteria;__Rhizobiales;__Rhodobiaceae;__Rhodobium	0.000664286	0.000458926	0
Bacteria;__Proteobacteria;__Alphaproteobacteria;__Rhizobiales;__Xanthobacteraceae;__uncultured	2.07589e-05	0	0
Bacteria;__Proteobacteria;__Alphaproteobacteria;__Rhizobiales;Other;Other	4.15179e-05	0	0
Bacteria;__Proteobacteria;__Alphaproteobacteria;__Rhodobacterales;__Rhodobacteraceae;__Leisingera	0.000249107	0.000275356	2.82016e-05
Bacteria;__Proteobacteria;__Alphaproteobacteria;__Rhodobacterales;__Rhodobacteraceae;__Nereida	2.07589e-05	0	0.000197411
Bacteria;__Proteobacteria;__Alphaproteobacteria;__Rhodobacterales;__Rhodobacteraceae;__Octadecabacter	0	0	2.82016e-05
Bacteria;__Proteobacteria;__Alphaproteobacteria;__Rhodobacterales;__Rhodobacteraceae;__Sulfitobacter	8.30358e-05	0	0
Bacteria;__Proteobacteria;__Alphaproteobacteria;__Rhodobacterales;__Rhodobacteraceae;__uncultured	0.000560492	0.000504819	0.00507629
Bacteria;__Proteobacteria;__Alphaproteobacteria;__Rhodobacterales;__Rhodobacteraceae;Other	0.000290625	0.000160624	0.00194591
Bacteria;__Proteobacteria;__Alphaproteobacteria;__Rhodospirillales;__Rhodospirillaceae;__Defluviicoccus	2.07589e-05	6.88389e-05	2.82016e-05
Bacteria;__Proteobacteria;__Alphaproteobacteria;__Rhodospirillales;__Rhodospirillaceae;__Magnetospira	0	0	8.46048e-05
Bacteria;__Proteobacteria;__Alphaproteobacteria;__Rhodospirillales;__Rhodospirillaceae;__Pelagibius	0	2.29463e-05	0
Bacteria;__Proteobacteria;__Alphaproteobacteria;__Rhodospirillales;__Rhodospirillaceae;__uncultured	0.000124554	0.000275356	0.000112806
Bacteria;__Proteobacteria;__Alphaproteobacteria;__Rhodospirillales;__Rhodospirillaceae;Other	8.30358e-05	6.88389e-05	5.64032e-05
Bacteria;__Proteobacteria;__Alphaproteobacteria;__Rickettsiales;__mitochondria;__g	0	0	5.64032e-05
Bacteria;__Proteobacteria;__Alphaproteobacteria;__Rickettsiales;__TK34;__g	0.000290625	0.000321248	2.82016e-05
Bacteria;__Proteobacteria;__Alphaproteobacteria;__Rickettsiales;Other;Other	0	4.58926e-05	0
Bacteria;__Proteobacteria;__Alphaproteobacteria;__SB1-18;__f;__g	0	0	8.46048e-05
Bacteria;__Proteobacteria;__Alphaproteobacteria;__Sneathiellales;__Sneathiellaceae;__Sneathiella	0	0	8.46048e-05
Bacteria;__Proteobacteria;__Alphaproteobacteria;__ss1-B-07-44;__f;__g	4.15179e-05	0	0
Bacteria;__Proteobacteria;__Alphaproteobacteria;Other;Other;Other	0.000435938	0.000160624	0.00126907
Bacteria;__Proteobacteria;__Betaproteobacteria;__Burkholderiales;__Oxalobacteraceae;__Janthinobacterium	0	0	2.82016e-05
Bacteria;__Proteobacteria;__Betaproteobacteria;__Hydrogenophilales;__Hydrogenophilaceae;__Thiobacillus	6.22768e-05	0	0
Bacteria;__Proteobacteria;__Betaproteobacteria;__Nitrosomonadales;__Nitrosomonadaceae;__Nitrosomonas	2.07589e-05	0	0
Bacteria;__Proteobacteria;__Deltaproteobacteria;__43F-1404R;__f;__g	0	6.88389e-05	0
Bacteria;__Proteobacteria;__Deltaproteobacteria;__Bdellovibrionales;__Bacteriovoracaceae;__Bacteriovorax	0	0	2.82016e-05
Bacteria;__Proteobacteria;__Deltaproteobacteria;__Bdellovibrionales;__Bacteriovoracaceae;__Deferrisoma	6.22768e-05	4.58926e-05	2.82016e-05
Bacteria;__Proteobacteria;__Deltaproteobacteria;__Bdellovibrionales;__Bacteriovoracaceae;__Peredibacter	0	0	0.000112806
Bacteria;__Proteobacteria;__Deltaproteobacteria;__Bdellovibrionales;__Bacteriovoracaceae;__uncultured	0.000207589	0.000114732	0.000141008
Bacteria;__Proteobacteria;__Deltaproteobacteria;__Bdellovibrionales;__Bacteriovoracaceae;Other	0.000352902	0.000481872	0.000253814
Bacteria;__Proteobacteria;__Deltaproteobacteria;__Bdellovibrionales;__Bdellovibrionaceae;__Bdellovibrio	8.30358e-05	4.58926e-05	0.000225613
Bacteria;__Proteobacteria;__Deltaproteobacteria;__Bdellovibrionales;__Bdellovibrionaceae;__OM27_clade	0	0	2.82016e-05
Bacteria;__Proteobacteria;__Deltaproteobacteria;__Desulfarculales;__Desulfarculaceae;__uncultured	0.0300174	0.0287058	0.0188387
Bacteria;__Proteobacteria;__Deltaproteobacteria;__Desulfobacterales;__Desulfobacteraceae;__Desulfobacterium	0	0	2.82016e-05
Bacteria;__Proteobacteria;__Deltaproteobacteria;__Desulfobacterales;__Desulfobacteraceae;__Desulfobacula	0.000207589	0.000206517	0.00194591
Bacteria;__Proteobacteria;__Deltaproteobacteria;__Desulfobacterales;__Desulfobacteraceae;__Desulfococcus	0.0128083	0.0112666	0.00899631
Bacteria;__Proteobacteria;__Deltaproteobacteria;__Desulfobacterales;__Desulfobacteraceae;__Desulfofrigus	0	2.29463e-05	0
Bacteria;__Proteobacteria;__Deltaproteobacteria;__Desulfobacterales;__Desulfobacteraceae;__Desulfonema	0	2.29463e-05	2.82016e-05
Bacteria;__Proteobacteria;__Deltaproteobacteria;__Desulfobacterales;__Desulfobacteraceae;__Desulfosalsimonas	0.000228348	0.000413034	0.000592233
Bacteria;__Proteobacteria;__Deltaproteobacteria;__Desulfobacterales;__Desulfobacteraceae;__Desulfosarcina	4.15179e-05	2.29463e-05	8.46048e-05
Bacteria;__Proteobacteria;__Deltaproteobacteria;__Desulfobacterales;__Desulfobacteraceae;__SEEP-SRB1	0.0801918	0.0781322	0.0565724
Bacteria;__Proteobacteria;__Deltaproteobacteria;__Desulfobacterales;__Desulfobacteraceae;__Sva0081_sediment_group	0.000954912	0.00128499	0.00070504
Bacteria;__Proteobacteria;__Deltaproteobacteria;__Desulfobacterales;__Desulfobacteraceae;__uncultured	0.00535581	0.00497935	0.0140444
Bacteria;__Proteobacteria;__Deltaproteobacteria;__Desulfobacterales;__Desulfobacteraceae;Other	0.0032384	0.00192749	0.00507629
Bacteria;__Proteobacteria;__Deltaproteobacteria;__Desulfobacterales;__Desulfobulbaceae;__Desulfobulbus	0.0279	0.0264112	0.0443611
Bacteria;__Proteobacteria;__Deltaproteobacteria;__Desulfobacterales;__Desulfobulbaceae;__Desulfocapsa	0.00166072	0.0012391	0.00930652
Bacteria;__Proteobacteria;__Deltaproteobacteria;__Desulfobacterales;__Desulfobulbaceae;__Desulforhopalus	0	0	0.000197411
Bacteria;__Proteobacteria;__Deltaproteobacteria;__Desulfobacterales;__Desulfobulbaceae;__MSBL7	6.22768e-05	4.58926e-05	0.000366621
Bacteria;__Proteobacteria;__Deltaproteobacteria;__Desulfobacterales;__Desulfobulbaceae;__SEEP-SRB2	0.0587271	0.0629876	0.0322626
Bacteria;__Proteobacteria;__Deltaproteobacteria;__Desulfobacterales;__Desulfobulbaceae;__SEEP-SRB4	0.000892635	0.000734282	0.00318678
Bacteria;__Proteobacteria;__Deltaproteobacteria;__Desulfobacterales;__Desulfobulbaceae;__uncultured	2.07589e-05	0	0
Bacteria;__Proteobacteria;__Deltaproteobacteria;__Desulfobacterales;__Desulfobulbaceae;Other	0.000456697	0.000252409	0.00107166
Bacteria;__Proteobacteria;__Deltaproteobacteria;__Desulfobacterales;__Nitrospinaceae;__uncultured	0.00145313	0.000963745	0.000394822
Bacteria;__Proteobacteria;__Deltaproteobacteria;__Desulfobacterales;Other;Other	0.000456697	0.00018357	0.000225613
Bacteria;__Proteobacteria;__Deltaproteobacteria;__Desulfovibrionales;__Desulfovibrionaceae;__Desulfovibrio	2.07589e-05	0	0.00273555
Bacteria;__Proteobacteria;__Deltaproteobacteria;__Desulfovibrionales;__Desulfovibrionaceae;Other	0	0	5.64032e-05
Bacteria;__Proteobacteria;__Deltaproteobacteria;__Desulfovibrionales;Other;Other	4.15179e-05	0	0
Bacteria;__Proteobacteria;__Deltaproteobacteria;__Desulfurellales;__Desulfurellaceae;__Hippea	0	0	0.000253814
Bacteria;__Proteobacteria;__Deltaproteobacteria;__Desulfurellales;__Desulfurellaceae;__uncultured	8.30358e-05	2.29463e-05	2.82016e-05
Bacteria;__Proteobacteria;__Deltaproteobacteria;__Desulfuromonadales;__Desulfuromonadaceae;__Desulfuromonas	0.000373661	0.000413034	0.00239713
Bacteria;__Proteobacteria;__Deltaproteobacteria;__Desulfuromonadales;__Desulfuromonadaceae;__Desulfuromusa	0.000145313	0.000137678	0.0102936
Bacteria;__Proteobacteria;__Deltaproteobacteria;__Desulfuromonadales;__Desulfuromonadaceae;__Pelobacter	0.000124554	0.00431391	0.0224767
Bacteria;__Proteobacteria;__Deltaproteobacteria;__Desulfuromonadales;__Desulfuromonadaceae;Other	0	2.29463e-05	0.000874249
Bacteria;__Proteobacteria;__Deltaproteobacteria;__Desulfuromonadales;__Geobacteraceae;__Geobacter	2.07589e-05	0.000160624	0.000141008
Bacteria;__Proteobacteria;__Deltaproteobacteria;__Desulfuromonadales;__GR-WP33-58;__g	0	0	0.000141008
Bacteria;__Proteobacteria;__Deltaproteobacteria;__Desulfuromonadales;__Sva1033;__g	8.30358e-05	0	0.00053583
Bacteria;__Proteobacteria;__Deltaproteobacteria;__Desulfuromonadales;Other;Other	8.30358e-05	2.29463e-05	0.000225613
Bacteria;__Proteobacteria;__Deltaproteobacteria;__DTB120;__f;__g	0.000145313	0.000206517	0.000253814
Bacteria;__Proteobacteria;__Deltaproteobacteria;__GR-WP33-30;__f;__g	0.000228348	0.000275356	5.64032e-05
Bacteria;__Proteobacteria;__Deltaproteobacteria;__Myxococcales;__0319-6G20;__g	0.000664286	0.000596604	0.000282016
Bacteria;__Proteobacteria;__Deltaproteobacteria;__Myxococcales;__Haliangiaceae;__Haliangium	0.000145313	0.00018357	0.000564032
Bacteria;__Proteobacteria;__Deltaproteobacteria;__Myxococcales;__Sandaracinaceae;__g	0.00392344	0.00357962	0.000366621
Bacteria;__Proteobacteria;__Deltaproteobacteria;__Myxococcales;__Sandaracinaceae;Other	6.22768e-05	4.58926e-05	0.000253814
Bacteria;__Proteobacteria;__Deltaproteobacteria;__Myxococcales;__uncultured;__g	0.000809599	0.000711335	0.00141008
Bacteria;__Proteobacteria;__Deltaproteobacteria;__Myxococcales;__VHS-B3-70;__g	0.000518974	0.000596604	8.46048e-05
Bacteria;__Proteobacteria;__Deltaproteobacteria;__Myxococcales;Other;Other	0.000145313	0.000298302	0.000338419
Bacteria;__Proteobacteria;__Deltaproteobacteria;__SAR324_clade(Marine_group_B);__f;__g	0.000830358	0.00110142	5.64032e-05
Bacteria;__Proteobacteria;__Deltaproteobacteria;__Sh765B-TzT-29;__f;__g	0.00186831	0.00151446	0.000197411
Bacteria;__Proteobacteria;__Deltaproteobacteria;__Sva0485;__f;__g	0.00124554	0.00121615	0.00104346
Bacteria;__Proteobacteria;__Deltaproteobacteria;__Syntrophobacterales;__Syntrophaceae;__Desulfomonile	0	0	5.64032e-05
Bacteria;__Proteobacteria;__Deltaproteobacteria;__Syntrophobacterales;__Syntrophaceae;__uncultured	0.00110022	0.00114732	0.000564032
Bacteria;__Proteobacteria;__Deltaproteobacteria;__Syntrophobacterales;__Syntrophaceae;Other	0.002325	0.0028224	0.000479427
Bacteria;__Proteobacteria;__Deltaproteobacteria;__Syntrophobacterales;__Syntrophobacteraceae;__uncultured	8.30358e-05	9.17852e-05	0
Bacteria;__Proteobacteria;__Deltaproteobacteria;Other;Other;Other	0.00141161	0.00087196	0.00121267
Bacteria;__Proteobacteria;__Epsilonproteobacteria;__Campylobacterales;__Campylobacteraceae;__Arcobacter	0.000269866	0.000137678	0.000112806
Bacteria;__Proteobacteria;__Epsilonproteobacteria;__Campylobacterales;__Campylobacteraceae;__Campylobacter	0.000186831	0.000206517	0.00138188
Bacteria;__Proteobacteria;__Epsilonproteobacteria;__Campylobacterales;__Campylobacteraceae;__Sulfurospirillum	0	0	8.46048e-05
Bacteria;__Proteobacteria;__Epsilonproteobacteria;__Campylobacterales;__Helicobacteraceae;__Sulfurimonas	0.00452545	0.00527765	0.0116191
Bacteria;__Proteobacteria;__Epsilonproteobacteria;__Campylobacterales;__Helicobacteraceae;__Sulfurovum	0.0669891	0.0395135	0.0958008
Bacteria;__Proteobacteria;__Epsilonproteobacteria;__Campylobacterales;__Helicobacteraceae;Other	0.000352902	0.000160624	0.00070504
Bacteria;__Proteobacteria;__Epsilonproteobacteria;__Campylobacterales;Other;Other	0	4.58926e-05	0
Bacteria;__Proteobacteria;__Gammaproteobacteria;__Alteromonadales;__Alteromonadaceae;__Halioglobus	0.000290625	0.000229463	0.000761443
Bacteria;__Proteobacteria;__Gammaproteobacteria;__Alteromonadales;__Alteromonadaceae;__OM60(NOR5)_clade	2.07589e-05	4.58926e-05	5.64032e-05
Bacteria;__Proteobacteria;__Gammaproteobacteria;__Alteromonadales;__Alteromonadaceae;Other	0.000851117	0.000527765	0.000338419
Bacteria;__Proteobacteria;__Gammaproteobacteria;__Alteromonadales;__Colwelliaceae;__Colwellia	2.07589e-05	0	0.00070504
Bacteria;__Proteobacteria;__Gammaproteobacteria;__Alteromonadales;__Moritellaceae;__Moritella	2.07589e-05	2.29463e-05	2.82016e-05
Bacteria;__Proteobacteria;__Gammaproteobacteria;__Alteromonadales;__Pseudoalteromonadaceae;__Pseudoalteromonas	0.0012663	0.000917852	0
Bacteria;__Proteobacteria;__Gammaproteobacteria;__Alteromonadales;__Psychromonadaceae;__Psychromonas	0.000124554	9.17852e-05	0.00053583
Bacteria;__Proteobacteria;__Gammaproteobacteria;__Alteromonadales;__Shewanellaceae;__Shewanella	4.15179e-05	9.17852e-05	2.82016e-05
Bacteria;__Proteobacteria;__Gammaproteobacteria;__BD7-8_marine_group;__f;__g	0.000249107	0.000160624	0.00245354
Bacteria;__Proteobacteria;__Gammaproteobacteria;__Chromatiales;__Chromatiaceae;__Nitrosococcus	4.15179e-05	6.88389e-05	0
Bacteria;__Proteobacteria;__Gammaproteobacteria;__Chromatiales;__Chromatiaceae;Other	2.07589e-05	0	0
Bacteria;__Proteobacteria;__Gammaproteobacteria;__Chromatiales;__Ectothiorhodospiraceae;__Acidiferrobacter	0.00774309	0.0062414	0.000987055
Bacteria;__Proteobacteria;__Gammaproteobacteria;__Chromatiales;__Ectothiorhodospiraceae;__Thioalkalispira	2.07589e-05	0	0
Bacteria;__Proteobacteria;__Gammaproteobacteria;__Chromatiales;__Ectothiorhodospiraceae;Other	2.07589e-05	2.29463e-05	0
Bacteria;__Proteobacteria;__Gammaproteobacteria;__Chromatiales;Other;Other	0.000207589	0	0
Bacteria;__Proteobacteria;__Gammaproteobacteria;__CS-B046;__f;__g	0.00178527	0.00128499	0.00203051
Bacteria;__Proteobacteria;__Gammaproteobacteria;__E01-9C-26_marine_group;__f;__g	0.000871876	0.00043598	0.000676838
Bacteria;__Proteobacteria;__Gammaproteobacteria;__Enterobacteriales;__Enterobacteriaceae;__Escherichia-Shigella	0	2.29463e-05	2.82016e-05
Bacteria;__Proteobacteria;__Gammaproteobacteria;__Enterobacteriales;__Enterobacteriaceae;__Pantoea	2.07589e-05	0	0
Bacteria;__Proteobacteria;__Gammaproteobacteria;__Enterobacteriales;__Enterobacteriaceae;Other	0	6.88389e-05	5.64032e-05
Bacteria;__Proteobacteria;__Gammaproteobacteria;__HOC36;__f;__g	0	0	5.64032e-05
Bacteria;__Proteobacteria;__Gammaproteobacteria;__KI89A_clade;__f;__g	0	0	5.64032e-05
Bacteria;__Proteobacteria;__Gammaproteobacteria;__Legionellales;__Coxiellaceae;__Coxiella	0.000186831	0.000137678	0.000112806
Bacteria;__Proteobacteria;__Gammaproteobacteria;__Legionellales;__Legionellaceae;__uncultured	6.22768e-05	0	0
Bacteria;__Proteobacteria;__Gammaproteobacteria;__Methylococcales;__Marine_Methylotrophic_Group_1;__g	0.000249107	0.000481872	0.000564032
Bacteria;__Proteobacteria;__Gammaproteobacteria;__Methylococcales;__Marine_Methylotrophic_Group_2;__g	0	0.000137678	0.00070504
Bacteria;__Proteobacteria;__Gammaproteobacteria;__Methylococcales;__Methylococcaceae;__Methylobacter	0.000207589	0.000458926	0
Bacteria;__Proteobacteria;__Gammaproteobacteria;__Methylococcales;Other;Other	0.000830358	0.000711335	0.000479427
Bacteria;__Proteobacteria;__Gammaproteobacteria;__Oceanospirillales;__Alcanivoracaceae;__Kangiella	2.07589e-05	0	0.000282016
Bacteria;__Proteobacteria;__Gammaproteobacteria;__Oceanospirillales;__Halomonadaceae;__Halomonas	0	2.29463e-05	0
Bacteria;__Proteobacteria;__Gammaproteobacteria;__Oceanospirillales;__MBAE14;__g	2.07589e-05	0	0
Bacteria;__Proteobacteria;__Gammaproteobacteria;__Oceanospirillales;__Oceanospirillaceae;__Oleispira	6.22768e-05	4.58926e-05	0
Bacteria;__Proteobacteria;__Gammaproteobacteria;__Oceanospirillales;__Oleiphilaceae;__Oleiphilus	0	0	8.46048e-05
Bacteria;__Proteobacteria;__Gammaproteobacteria;__Oceanospirillales;__OM182_clade;__g	0	0	2.82016e-05
Bacteria;__Proteobacteria;__Gammaproteobacteria;__Oceanospirillales;__SUP05_cluster;__g	0	0	2.82016e-05
Bacteria;__Proteobacteria;__Gammaproteobacteria;__Oceanospirillales;Other;Other	4.15179e-05	0	0
Bacteria;__Proteobacteria;__Gammaproteobacteria;__Order_Incertae_Sedis;__Family_Incertae_Sedis;__Marinicella	0.00415179	0.00419917	0.00341239
Bacteria;__Proteobacteria;__Gammaproteobacteria;__Order_Incertae_Sedis;__Family_Incertae_Sedis;__Sedimenticola	0.0011625	0.0015833	0.000902451
Bacteria;__Proteobacteria;__Gammaproteobacteria;__Order_Incertae_Sedis;__Family_Incertae_Sedis;__Thiohalophilus	0.000290625	0.00043598	0.00194591
Bacteria;__Proteobacteria;__Gammaproteobacteria;__Order_Incertae_Sedis;__Family_Incertae_Sedis;Other	4.15179e-05	0	0.000225613
Bacteria;__Proteobacteria;__Gammaproteobacteria;__Pseudomonadales;__Moraxellaceae;__Acinetobacter	0.000124554	0	8.46048e-05
Bacteria;__Proteobacteria;__Gammaproteobacteria;__Pseudomonadales;__Pseudomonadaceae;__Pseudomonas	2.07589e-05	4.58926e-05	2.82016e-05
Bacteria;__Proteobacteria;__Gammaproteobacteria;__Sva0071;__f;__g	0.00963215	0.00536944	0.000789644
Bacteria;__Proteobacteria;__Gammaproteobacteria;__Thiotrichales;__Piscirickettsiaceae;__endosymbionts	0.00112098	0.000826067	0.00642996
Bacteria;__Proteobacteria;__Gammaproteobacteria;__Thiotrichales;__Piscirickettsiaceae;__Marine_Methylotrophic_Group_3	2.07589e-05	2.29463e-05	0.000564032
Bacteria;__Proteobacteria;__Gammaproteobacteria;__Thiotrichales;__Piscirickettsiaceae;Other	4.15179e-05	0	0.000394822
Bacteria;__Proteobacteria;__Gammaproteobacteria;__Thiotrichales;__Thiotrichaceae;__Cocleimonas	0	6.88389e-05	0.000112806
Bacteria;__Proteobacteria;__Gammaproteobacteria;__Thiotrichales;__Thiotrichaceae;__uncultured	0.0188076	0.021386	0.00544291
Bacteria;__Proteobacteria;__Gammaproteobacteria;__Thiotrichales;__Thiotrichaceae;Other	4.15179e-05	0	0.00101526
Bacteria;__Proteobacteria;__Gammaproteobacteria;__Thiotrichales;Other;Other	2.07589e-05	0	0
Bacteria;__Proteobacteria;__Gammaproteobacteria;__Vibrionales;__Vibrionaceae;__Vibrio	4.15179e-05	4.58926e-05	0
Bacteria;__Proteobacteria;__Gammaproteobacteria;__Vibrionales;__Vibrionaceae;Other	0.000851117	0.000390087	8.46048e-05
Bacteria;__Proteobacteria;__Gammaproteobacteria;__Xanthomonadales;__JTB255_marine_benthic_group;__g	0.00178527	0.00165213	0.00157929
Bacteria;__Proteobacteria;__Gammaproteobacteria;__Xanthomonadales;__uncultured;__g	2.07589e-05	0	0
Bacteria;__Proteobacteria;__Gammaproteobacteria;__Xanthomonadales;Other;Other	0.000290625	0.000229463	0
Bacteria;__Proteobacteria;__Gammaproteobacteria;Other;Other;Other	0.0115212	0.0176457	0.00394822
Bacteria;__Proteobacteria;__JTB23;__o;__f;__g	6.22768e-05	0.000252409	0
Bacteria;__Proteobacteria;__Milano-WF1B-44;__o;__f;__g	0.00352902	0.00162919	0.00724781
Bacteria;__Proteobacteria;__pItb-vmat-80;__o;__f;__g	0	0	5.64032e-05
Bacteria;__Proteobacteria;__TA18;__o;__f;__g	0	2.29463e-05	5.64032e-05
Bacteria;__Proteobacteria;__Zetaproteobacteria;__Mariprofundales;__Mariprofundaceae;__Mariprofundus	2.07589e-05	2.29463e-05	0
Bacteria;__Proteobacteria;Other;Other;Other;Other	0.00105871	0.00144562	0.00191771
Bacteria;__RF3;__c;__o;__f;__g	0.000186831	0.000413034	0.000846048
Bacteria;__Spirochaetae;__Spirochaetes;__CW-1_termite_group;__f;__g	0.000145313	0.00018357	8.46048e-05
Bacteria;__Spirochaetae;__Spirochaetes;__Kazan-3B-09;__f;__g	0.000249107	0.000298302	0.000253814
Bacteria;__Spirochaetae;__Spirochaetes;__LK-44f;__f;__g	0.000103795	0.000229463	8.46048e-05
Bacteria;__Spirochaetae;__Spirochaetes;__LNR_A2-18;__f;__g	4.15179e-05	0.000114732	0.000141008
Bacteria;__Spirochaetae;__Spirochaetes;__MSBL2;__f;__g	0	0	0.000451225
Bacteria;__Spirochaetae;__Spirochaetes;__Spirochaetales;__Brevinemataceae;__Brevinema	4.15179e-05	0	0
Bacteria;__Spirochaetae;__Spirochaetes;__Spirochaetales;__Leptospiraceae;__uncultured	0.000145313	6.88389e-05	0.00016921
Bacteria;__Spirochaetae;__Spirochaetes;__Spirochaetales;__LH041;__g	4.15179e-05	0	0
Bacteria;__Spirochaetae;__Spirochaetes;__Spirochaetales;__PL-11B10;__g	0	2.29463e-05	0
Bacteria;__Spirochaetae;__Spirochaetes;__Spirochaetales;__Spirochaetaceae;__Spirochaeta	0.0123101	0.0145709	0.0126061
Bacteria;__Spirochaetae;__Spirochaetes;__Spirochaetales;__Spirochaetaceae;__uncultured	0.00174375	0.0012391	0.000902451
Bacteria;__Spirochaetae;__Spirochaetes;__Spirochaetales;__Spirochaetaceae;Other	0.000207589	0.000229463	0.000112806
Bacteria;__Spirochaetae;__Spirochaetes;Other;Other;Other	0.00512746	0.00660854	0.0071068
Bacteria;__TA06;__c;__o;__f;__g	0.00438014	0.00468105	0.0122113
Bacteria;__Tenericutes;__Mollicutes;__RF9;__f;__g	0	0	2.82016e-05
Bacteria;__TM6;__c;__o;__f;__g	0.00238728	0.00220285	0.00217152
Bacteria;__Verrucomicrobia;__OPB35_soil_group;__o;__f;__g	2.07589e-05	0	0
Bacteria;__Verrucomicrobia;__Opitutae;__Opitutales;__Opitutaceae;Other	2.07589e-05	9.17852e-05	5.64032e-05
Bacteria;__Verrucomicrobia;__Opitutae;__Puniceicoccales;__Puniceicoccaceae;__uncultured	2.07589e-05	6.88389e-05	8.46048e-05
Bacteria;__Verrucomicrobia;__Opitutae;Other;Other;Other	2.07589e-05	0	0
Bacteria;__Verrucomicrobia;__Verrucomicrobiae;__Verrucomicrobiales;__DEV007;__g	0.000103795	2.29463e-05	5.64032e-05
Bacteria;__Verrucomicrobia;__Verrucomicrobiae;__Verrucomicrobiales;__Rubritaleaceae;__Rubritalea	6.22768e-05	0	0
Bacteria;__Verrucomicrobia;__Verrucomicrobiae;__Verrucomicrobiales;__Verrucomicrobiaceae;__Persicirhabdus	4.15179e-05	0.000137678	0.000197411
Bacteria;__Verrucomicrobia;__Verrucomicrobiae;__Verrucomicrobiales;__Verrucomicrobiaceae;__Roseibacillus	0	2.29463e-05	0
Bacteria;__Verrucomicrobia;__Verrucomicrobiae;__Verrucomicrobiales;__Verrucomicrobiaceae;__uncultured	2.07589e-05	4.58926e-05	0
Bacteria;__Verrucomicrobia;__Verrucomicrobiae;__Verrucomicrobiales;Other;Other	0	4.58926e-05	2.82016e-05
Bacteria;__WCHB1-60;__c;__o;__f;__g	2.07589e-05	0	8.46048e-05
Bacteria;Other;Other;Other;Other;Other	0.00604085	0.00543827	0.00403283
Unassigned;Other;Other;Other;Other;Other	0.0256165	0.0315053	0.0303167

## Sheet: SDF 3b
Supplementary Data File 3b) Relative abundance of OTUs associated with methanogens (red) and anaerobic methanotrophs (purple).
	0 days	326 days	170 days
Taxon	#3731 T1	#3731 T2	#5133
Archaea;__Euryarchaeota;__Methanomicrobia;__ANME-1;__ANME-1a;__g	0.0700407	0.0791877	0.0305141
Archaea;__Euryarchaeota;__Methanomicrobia;__ANME-1;__ANME-1b;__g	0.0638545	0.0369665	0.0494938
Archaea;__Euryarchaeota;__Methanomicrobia;__ANME-1;Other;Other	0.00583326	0.00571363	0.0119011
Archaea;__Euryarchaeota;__Methanomicrobia;__Methanocellales;Other;Other	0	0	0
Archaea;__Euryarchaeota;__Methanomicrobia;__Methanomicrobiales;__Methanomicrobiaceae;__Methanogenium	0	2.29463e-05	0
Archaea;__Euryarchaeota;__Methanomicrobia;__Methanomicrobiales;Other;Other	0	0	0
Archaea;__Euryarchaeota;__Methanomicrobia;__Methanosarcinales;__ANME-2a-2b;__ANME-2b	0.0164203	0.0187012	0.0155391
Archaea;__Euryarchaeota;__Methanomicrobia;__Methanosarcinales;__ANME-2a-2b;__g	0.0059163	0.00849013	0.00470966
Archaea;__Euryarchaeota;__Methanomicrobia;__Methanosarcinales;__ANME-2a-2b;Other	8.30358e-05	0	0
Archaea;__Euryarchaeota;__Methanomicrobia;__Methanosarcinales;__ANME-2c;__g	0.00927925	0.0102799	0.00606334
Archaea;__Euryarchaeota;__Methanomicrobia;__Methanosarcinales;__GOM_Arc_I;__g	4.15179e-05	6.88389e-05	0
Archaea;__Euryarchaeota;__Methanomicrobia;__Methanosarcinales;__Methanosaetaceae;__Methanosaeta	6.22768e-05	9.17852e-05	0
Archaea;__Euryarchaeota;__Methanomicrobia;__Methanosarcinales;__Methanosarcinaceae;__ANME-3	6.22768e-05	4.58926e-05	0.000112806
Archaea;__Euryarchaeota;__Methanomicrobia;__Methanosarcinales;__Methanosarcinaceae;__Methanococcoides	2.07589e-05	0	2.82016e-05
Archaea;__Euryarchaeota;__Methanomicrobia;__Methanosarcinales;__Methanosarcinaceae;__Methanolobus	0	0	0
Archaea;__Euryarchaeota;__Methanomicrobia;__Methanosarcinales;__Methanosarcinaceae;Other	0	0	0.000141008
Archaea;__Euryarchaeota;__Methanomicrobia;__Methanosarcinales;Other;Other	0	4.58926e-05	0
Sum of Methanogen relative abundance	8.30358e-05	0.000160624	0.00016921
Sum of ANME relative abundance	0.171531	0.159454	0.118334
Relative abundance ratios of ANME to methenogen lineages	2065.75	992.714	699.333
