# Supplementary material for: Proteomic Stable Isotope Probing Reveals Biosynthesis Dynamics of Slow Growing Methane Based Microbial Communities
Source: Front Microbiol. 2016 Apr 29;7:563. doi: 10.3389/fmicb.2016.00563 (PMC4850331; doi:10.3389/fmicb.2016.00563)
Supplement: Supplementary file 5 [file DataSheet4.xlsx]

## Sheet: SDF 4a
Supplementary Data File 4a: The sample distributions and phylogenetic assignments of all reverse methanogenesis proteins detected in this study
Enzyme	Sample Distribution*	Metagenomic Database ORF	Phylogenetic Assignment of ORF
Formylmethanofuran dehydrogenase, subunit A (FmdA)
	1,2,3,4,5,6	5datasets_contig_114564_2	Archaea // Euryarchaeota // Methanomicrobia // Methanosarcinales // Unclassified Methanosarcinaceae
	5	ANME2a_03516	Archaea // Euryarchaeota // Methanomicrobia // Methanosarcinales // Unclassified ANME-2a
	5,6	5579_contig_19794_3	Archaea // Euryarchaeota // Methanomicrobia // Methanosarcinales // Unclassified ANME-2a
	1,3,5	5133_contig_2193_7	Archaea // Euryarchaeota // Methanomicrobia // Methanosarcinales // Unclassified ANME-2b
	1,2,3,4,5,6	3datasets_contig_83561_2	Bacteria // Proteobacteria // Deltaproteobacteria // Desulfuromonadales // Unclassified Geobacteraceae
	1,2,3,4,5,6	5133_contig_4168_10	Archaea // Euryarchaeota // Methanomicrobia // Methanosarcinales // Unclassified ANME-2b
	1,2,3,4,5,6	ANME2a_02778	Archaea // Euryarchaeota // Methanomicrobia // Methanosarcinales // Unclassified ANME-2a
Formylmethanofuran dehydrogenase, subunit B (FmdB)
	1,2,3,4,5,6	5datasets_contig_262538_2	Archaea // Euryarchaeota // Methanomicrobia // Methanosarcinales // Unclassified Methanosarcinaceae
	1,2,3,4,5,6	5datasets_contig_463216_1	Archaea // Euryarchaeota // Methanomicrobia // Methanosarcinales // Unclassified Methanosarcinaceae
	1,2,3,4	gi|268325085|emb|CBH38673.1|	Unclassified Archaea
	1,5,6	ANME2a_02779	Archaea // Euryarchaeota // Methanomicrobia // Methanosarcinales // Unclassified ANME-2a
Formylmethanofuran dehydrogenase, subunit C (FmdC)
	1,3,5,6	3730_contig_179_14	Archaea // Euryarchaeota // Methanomicrobia // Methanosarcinales // Unclassified Methanosarcinaceae
Formylmethanofuran dehydrogenase, subunit D (FmdD)
	1,3,5,6	3datasets_contig_12_6	Archaea // Euryarchaeota // Methanomicrobia // Methanosarcinales // Unclassified ANME-2a
	5,6	3datasets_contig_18774_1	Archaea // Euryarchaeota // Methanomicrobia // Methanosarcinales // Unclassified Methanosarcinaceae
	1	5datasets_contig_89905_4	Archaea // Euryarchaeota // Methanomicrobia // Unclassified ANME-1
	3,5,6	5datasets_contig_71184_2	Archaea // Euryarchaeota // Methanomicrobia // Methanosarcinales // Unclassified Methanosarcinaceae
Formylmethanofuran tetrahydromethanopterin formyltransferase (Ftr)
	2,3,4,5	gi|268324991|emb|CBH38579.1|	Unclassified Archaea
	5	5datasets_contig_468824_2	Unclassified Archaea
	1,2,3,4,5,6	5datasets_contig_26045_2	Archaea // Euryarchaeota // Methanomicrobia // Unclassified Methanosarcinales
	1,3,5	5datasets_contig_221792_2	Archaea // Euryarchaeota // Methanomicrobia // Methanosarcinales // Unclassified Methanosarcinaceae
	2,3,6	gi|630831859|gb|KCZ73568.1|	Archaea // Euryarchaeota // Methanomicrobia // Methanosarcinales // Cand. Methanoperedenaceae // Cand. Methanoperedens // Cand. Methanoperedens nitroreducens
	1,5,6	5datasets_contig_76069_3	Archaea // Euryarchaeota // Methanomicrobia // Methanosarcinales // Unclassified ANME-2a
	1,2,3,4,5,6	ANME2a_00044	Archaea // Euryarchaeota // Methanomicrobia // Methanosarcinales // Unclassified ANME-2a
	1,2,3,4,5,6	5datasets_contig_136317_2	Archaea // Unclassified Euryarchaeota
Methenyltetrahydromethanopterin cyclohydrolase (Mch)
	3,5	3datasets_contig_1379_6	Archaea // Euryarchaeota // Methanomicrobia // Methanosarcinales // Cand. Methanoperedenaceae // Cand. Methanoperedens // Cand. Methanoperedens nitroreducens
	1	3730_contig_2532_4	Archaea // Euryarchaeota // Methanomicrobia // Methanosarcinales // Cand. Methanoperedenaceae // Cand. Methanoperedens // Cand. Methanoperedens nitroreducens
	1,3,6	BCs_pro_contig_06050_6050_1	Archaea // Euryarchaeota // Methanomicrobia // Methanosarcinales // Unclassified ANME-2c
	1,2,3,4,5,6	5133_contig_10831_1	Archaea // Euryarchaeota // Methanomicrobia // Methanosarcinales // Unclassified ANME-2c
	1,2,3,6	5datasets_contig_564282_1	Archaea // Euryarchaeota // Methanomicrobia // Methanosarcinales // Unclassified ANME-2c
	1,2,3,4,5,6	GZ26B2_14	Archaea // Euryarchaeota // Methanomicrobia // Methanosarcinales // Unclassified ANME-2c
	1,3	3730_contig_2658_8	Archaea // Euryarchaeota // Methanomicrobia // Unclassified ANME-1
	1,2,3,4,5,6	5datasets_contig_33945_2	Archaea // Euryarchaeota // Methanomicrobia // Methanosarcinales // Unclassified ANME-2c
	3,5	5datasets_contig_160653_3	Archaea // Euryarchaeota // Methanomicrobia // Methanosarcinales // Cand. Methanoperedenaceae // Cand. Methanoperedens // Cand. Methanoperedens nitroreducens
Methylenetetrahydromethanopterin dehydrogenase (Mtd)
	3	gi|268324311|emb|CBH37899.1|	Unclassified Archaea
	3	5133_contig_22861_1	Archaea // Euryarchaeota // Methanomicrobia // Unclassified ANME-1
	5,6	3730_contig_4534_6	Archaea // Euryarchaeota // Methanomicrobia // Methanosarcinales // Unclassified ANME-2b
	1,2,3,4,5,6	5133_contig_5332_3	Archaea // Euryarchaeota // Methanomicrobia // Methanosarcinales // Unclassified Methanosarcinaceae
	1,2,3,4,5,6	5datasets_contig_170115_1	Archaea // Euryarchaeota // Methanomicrobia // Methanosarcinales // Unclassified ANME-2a
	1,2,3,4,5,6	3730_contig_9042_4	Archaea // Euryarchaeota // Methanomicrobia // Unclassified ANME-1
	1,2,3,4,5,6	3datasets_contig_215640_2	Archaea // Euryarchaeota // Methanomicrobia // Methanosarcinales // Unclassified Methanosarcinaceae
Methylenetetrahydromethanopterin reductase (Mer)
	1,2,3,4,5,6	gi|330508245|ref|YP_004384673.1|	Archaea // Euryarchaeota // Methanomicrobia // Methanosarcinales // Methanosaetaceae // Methanosaeta // Methanosaeta concilii
	1,2,3,4,5,6	VO2_combined_contig_350914_2	Archaea // Euryarchaeota // Methanomicrobia // Methanosarcinales // Unclassified Methanosarcinaceae
	1,2,3,4,5,6	gi|91774282|ref|YP_566974.1|	Archaea // Euryarchaeota // Methanomicrobia // Methanosarcinales // Methanosarcinaceae // Methanococcoides // Methanococcoides burtonii
	1,2,3,4,5,6	5datasets_contig_46845_2	Archaea // Euryarchaeota // Methanomicrobia // Methanosarcinales // Unclassified Methanosarcinaceae
	5	gi|298676012|ref|YP_003727762.1|	Archaea // Euryarchaeota // Methanomicrobia // Methanosarcinales // Methanosarcinaceae // Methanohalobium // Methanohalobium evestigatum
	1,2,3,4,5,6	ANME2a_00379	Archaea // Euryarchaeota // Methanomicrobia // Methanosarcinales // Unclassified ANME-2a
	2,4,5,6	BCs_pro_contig_21546_21546_1	Archaea // Euryarchaeota // Methanomicrobia // Methanosarcinales // Unclassified Methanosarcinaceae
Tetrahydromethanopterin S-methyltransferase, subunit A (MtrA)
	1,2,3,4,5,6	3datasets_contig_124899_2	Archaea // Euryarchaeota // Methanomicrobia // Unclassified ANME-1
	1,6	3datasets_contig_146080_2	Archaea // Euryarchaeota // Methanomicrobia // Methanosarcinales // Unclassified Methanosarcinaceae
	1,2,3,4,5,6	5133_contig_11704_2	Archaea // Euryarchaeota // Methanomicrobia // Unclassified ANME-1
	5	3datasets_contig_194716_1	Archaea // Euryarchaeota // Methanomicrobia // Methanosarcinales // Unclassified Methanosarcinaceae
	5,6	5datasets_contig_125448_4	Archaea // Euryarchaeota // Methanomicrobia // Methanosarcinales // Unclassified Methanosarcinaceae
	1,2,4,5,6	3datasets_contig_109688_2	Archaea // Euryarchaeota // Methanomicrobia // Methanosarcinales // Unclassified Methanosarcinaceae
Tetrahydromethanopterin S-methyltransferase, subunit H (MtrH)
	1,2,3,4,5,6	3datasets_contig_92091_1	Archaea // Euryarchaeota // Methanomicrobia // Methanosarcinales // Unclassified Methanosarcinaceae
	1,3	3730_contig_1112_2	Archaea // Euryarchaeota // Methanomicrobia // Unclassified ANME-1
	1,2,3,4,5,6	5datasets_contig_31053_1	Archaea // Euryarchaeota // Methanomicrobia // Methanosarcinales // Unclassified Methanosarcinaceae
	1,2,3,4,5,6	5datasets_contig_279220_1	Unclassified Archaea
	5	5datasets_contig_99358_2	Archaea // Euryarchaeota // Methanomicrobia // Unclassified ANME-1
	1,2,3,4,5,6	5datasets_contig_69069_4	Archaea // Euryarchaeota // Methanomicrobia // Methanosarcinales // Unclassified Methanosarcinaceae
Tetrahydromethanopterin S-methyltransferase, subunit G (MtrG)
	5	3730_contig_1294_8	Archaea // Euryarchaeota // Methanomicrobia // Methanosarcinales // Unclassified ANME-2b
Methyl-coenzyme M reductase, subunit A (McrA)
	1,2,3,4,5,6	3datasets_contig_106744_1	Archaea // Euryarchaeota // Methanomicrobia // Methanosarcinales // Unclassified ANME-2c
	1,2,3,4,5,6	5133_contig_9500_3	Archaea // Euryarchaeota // Methanomicrobia // Unclassified ANME-1
	1,2,3,4,5,6	gi|298674844|ref|YP_003726594.1|	Archaea // Euryarchaeota // Methanomicrobia // Methanosarcinales // Methanosarcinaceae // Methanohalobium // Methanohalobium evestigatum
	2,4,5	5579_contig_17107_2	Archaea // Euryarchaeota // Methanomicrobia // Unclassified ANME-1
	1,2,3,5,6	5datasets_contig_235820_1	Archaea // Euryarchaeota // Methanomicrobia // Methanosarcinales // Unclassified Methanosarcinaceae
	2,3,5	GZ13E1_3	Archaea // Euryarchaeota // Methanomicrobia // Unclassified ANME-1
	1,2,3,4,5,6	gi|268325896|emb|CBH39484.1|	Unclassified Archaea
	1,2,3,4,5	5579_contig_34618_1	Archaea // Euryarchaeota // Methanomicrobia // Unclassified ANME-1
	5,6	3730_contig_13416_3	Archaea // Euryarchaeota // Methanomicrobia // Unclassified ANME-1
	1,2,3,4,5,6	5133_contig_8396_3	Archaea // Euryarchaeota // Methanomicrobia // Methanosarcinales // Unclassified ANME-2b
	1,2,3,4,5,6	GZ26B2_4	Archaea // Euryarchaeota // Methanomicrobia // Methanosarcinales // Unclassified ANME-2c
	1,2,3,4,5,6	3datasets_contig_53544_2	Archaea // Euryarchaeota // Methanomicrobia // Methanosarcinales // Unclassified Methanosarcinaceae
	1,2,3,4,5,6	5datasets_contig_155768_2	Archaea // Euryarchaeota // Methanomicrobia // Methanosarcinales // Unclassified Methanosarcinaceae
	1,2,3,4,5,6	gi|268323819|emb|CBH37407.1|	Unclassified Archaea
	1,2,3,4,5,6	3datasets_contig_53544_3	Unclassified Archaea
	1,2,3,4,5,6	GZ9C4_8	Archaea // Euryarchaeota // Methanomicrobia // Unclassified ANME-1
	1,2,3,4,5,6	GZ35D7_30	Archaea // Euryarchaeota // Methanomicrobia // Methanosarcinales // Unclassified ANME-2c
	1,2,3,4,5,6	ANME2a_02350	Archaea // Euryarchaeota // Methanomicrobia // Methanosarcinales // Unclassified ANME-2a
	1,2,3,4	GZ19C7_7	Archaea // Euryarchaeota // Methanomicrobia // Unclassified ANME-1
Methyl-coenzyme M reductase, subunit B (McrB)
	1,2,3,4	GZ9C4_6	Archaea // Euryarchaeota // Methanomicrobia // Unclassified ANME-1
	1,2,3,4,5,6	GZ30H9_29	Archaea // Euryarchaeota // Methanomicrobia // Unclassified ANME-1
	1,2,3,4,5,6	5datasets_contig_109424_1	Archaea // Euryarchaeota // Methanomicrobia // Methanosarcinales // Unclassified ANME-2c
	1,3,4,5,6	3datasets_contig_138908_3	Archaea // Euryarchaeota // Methanomicrobia // Unclassified ANME-1
	1,2,3,4,5,6	GZ33H6_29	Archaea // Euryarchaeota // Methanomicrobia // Unclassified ANME-1
	1,2,3,4,5,6	5datasets_contig_14500_12	Archaea // Euryarchaeota // Methanomicrobia // Methanosarcinales // Unclassified ANME-2a
	1,2,3,4,5,6	3730_contig_11844_4	Archaea // Euryarchaeota // Unclassified Methanomicrobia
	1,2,3,4,5,6	3datasets_contig_27578_4	Archaea // Euryarchaeota // Methanomicrobia // Methanosarcinales // Unclassified ANME-2a
	2,4,5	5579_contig_30039_2	Archaea // Euryarchaeota // Methanomicrobia // Unclassified ANME-1
	1,2,3,4,5,6	5datasets_contig_3794_1	Archaea // Euryarchaeota // Methanomicrobia // Methanosarcinales // Unclassified Methanosarcinaceae
	1,2,3,4,5,6	GZ24D9_1	Archaea // Euryarchaeota // Methanomicrobia // Unclassified ANME-1
	2,3,4,5,6	5datasets_contig_5482_4	Archaea // Euryarchaeota // Methanomicrobia // Methanosarcinales // Unclassified Methanosarcinaceae
	1,2,3,4,5,6	gi|268325894|emb|CBH39482.1|	Unclassified Archaea
	1,2,3,4,5,6	GZ27A8_56	Archaea // Euryarchaeota // Methanomicrobia // Methanosarcinales // Unclassified ANME-2c
	1,2,3,4,5,6	3datasets_contig_37401_2	Bacteria // Proteobacteria // Deltaproteobacteria // Desulfuromonadales // Unclassified Geobacteraceae
	1,2,3,4,5,6	3datasets_contig_173269_2	Archaea // Euryarchaeota // Methanomicrobia // Methanosarcinales // Unclassified ANME-2c
	1,2,3,4,5,6	gi|268323817|emb|CBH37405.1|	Unclassified Archaea
	1,2,3,4,5,6	GZ35D7_26	Archaea // Euryarchaeota // Methanomicrobia // Methanosarcinales // Unclassified ANME-2c
	1,2,3,4,5,6	gi|386001201|ref|YP_005919500.1|	Archaea // Euryarchaeota // Methanomicrobia // Methanosarcinales // Methanosaetaceae // Methanosaeta // Methanosaeta harundinacea
	1,3	GZ19C7_5	Archaea // Euryarchaeota // Methanomicrobia // Unclassified ANME-1
	1,2,3,4,5,6	ANME2a_02354	Archaea // Euryarchaeota // Methanomicrobia // Methanosarcinales // Unclassified ANME-2a
Methyl-coenzyme M reductase, subunit G (McrG)
	5	gi|91774327|ref|YP_567019.1|	Archaea // Euryarchaeota // Methanomicrobia // Methanosarcinales // Methanosarcinaceae // Methanococcoides // Methanococcoides burtonii
	1,2,3,4,5,6	BCs_pro_contig_06538_6538_1	Archaea // Euryarchaeota // Methanomicrobia // Methanosarcinales // Unclassified ANME-2a
	1,2,3,4,5,6	3datasets_contig_138908_5	Archaea // Euryarchaeota // Methanomicrobia // Unclassified ANME-1
	1,2,3,4,5,6	gi|630830962|gb|KCZ72672.1|	Archaea // Euryarchaeota // Methanomicrobia // Methanosarcinales // Cand. Methanoperedenaceae // Cand. Methanoperedens // Cand. Methanoperedens nitroreducens
	1,2,3,4,5,6	5datasets_contig_138836_1	Archaea // Euryarchaeota // Methanomicrobia // Methanosarcinales // Unclassified ANME-2c
	5,6	gi|330506956|ref|YP_004383384.1|	Archaea // Euryarchaeota // Methanomicrobia // Methanosarcinales // Methanosaetaceae // Methanosaeta // Methanosaeta concilii
	1,2,3,4,5,6	5datasets_contig_73238_2	Archaea // Euryarchaeota // Methanomicrobia // Methanosarcinales // Unclassified ANME-2c
	1,5	GZ13E1_2	Archaea // Euryarchaeota // Methanomicrobia // Unclassified ANME-1
	1,2,3,4,5,6	gi|268325895|emb|CBH39483.1|	Unclassified Archaea
	1,2,3,4,5,6	BCs_pro_contig_20017_20017_1	Unclassified Archaea
	1,2,3,4,5,6	3datasets_contig_25078_2	Archaea // Euryarchaeota // Methanomicrobia // Methanosarcinales // Unclassified ANME-2a
	1,2,3,4,5,6	gi|336476796|ref|YP_004615937.1|	Archaea // Euryarchaeota // Methanomicrobia // Methanosarcinales // Methanosarcinaceae // Methanosalsum // Methanosalsum zhilinae
	1,2,3,4,5,6	GZ26B2_3	Archaea // Euryarchaeota // Methanomicrobia // Methanosarcinales // Unclassified ANME-2c
	1,2,3,4,5,6	gi|268323818|emb|CBH37406.1|	Unclassified Archaea
	1,2,3,4,5,6	GZ9C4_7	Archaea // Euryarchaeota // Methanomicrobia // Unclassified ANME-1
	1,2,3,4,5,6	GZ35D7_29	Archaea // Euryarchaeota // Methanomicrobia // Methanosarcinales // Unclassified ANME-2c
	1,2,3,4,5	ANME2a_02351	Archaea // Euryarchaeota // Methanomicrobia // Methanosarcinales // Unclassified ANME-2a
	1,3,4	GZ19C7_6	Archaea // Euryarchaeota // Methanomicrobia // Unclassified ANME-1
Methyl-coenzyme M reductase, component A2 (McrA2)
	1,3,5,6	BCs_pro_contig_21451_21451_2	Archaea // Euryarchaeota // Methanomicrobia // Methanosarcinales // Unclassified ANME-2a
	3	5datasets_contig_46311_5	Archaea // Euryarchaeota // Methanomicrobia // Unclassified Methanosarcinales
	1,2,3,4,5,6	5133_contig_1032_17	Archaea // Euryarchaeota // Methanomicrobia // Methanosarcinales // Unclassified ANME-2b
	1,3,5,6	5133_contig_3098_8	Archaea // Euryarchaeota // Methanomicrobia // Methanosarcinales // Unclassified ANME-2b
	2,3,4,5,6	3730_contig_9012_2	Archaea // Euryarchaeota // Methanomicrobia // Methanosarcinales // Unclassified Methanosarcinaceae
Methyl-coenzyme M reductase, subunit C (McrC)
	5	GZ35D7_28	Archaea // Euryarchaeota // Methanomicrobia // Methanosarcinales // Unclassified ANME-2c
Methyl-coenzyme M reductase, subunit D (McrD)
	5	5579_contig_75246_1	Archaea // Euryarchaeota // Methanomicrobia // Methanosarcinales // Unclassified ANME-2a
	5	3datasets_contig_25078_4	Archaea // Euryarchaeota // Methanomicrobia // Methanosarcinales // Unclassified ANME-2a
	1,3,5,6	GZ35D7_27	Archaea // Euryarchaeota // Methanomicrobia // Methanosarcinales // Unclassified ANME-2c
F420 hydrogenase, subunit B (FrhB)
	1,2,3,4,5,6	GZ27A8_52	Unclassified Archaea
	1,2,3,4,5,6	3730_contig_39862_2	Unclassified Archaea
	5	ANME2a_00378	Archaea // Euryarchaeota // Methanomicrobia // Methanosarcinales // Unclassified ANME-2a
	1,2,3,4,5,6	5datasets_contig_55985_8	Archaea // Euryarchaeota // Methanomicrobia // Unclassified Methanosarcinales
	3,5	gi|268323770|emb|CBH37358.1|	Unclassified Archaea
	1,2,3,4,5,6	ANME2a_03223	Archaea // Euryarchaeota // Methanomicrobia // Methanosarcinales // Unclassified ANME-2a
	1,3,5,6	5133_contig_15547_7	Unclassified Archaea
	1,2,3,4,5,6	5datasets_contig_33456_2	Archaea // Euryarchaeota // Methanomicrobia // Methanosarcinales // Unclassified Methanosarcinaceae
	1,3,4,5,6	ANME2a_02262	Archaea // Euryarchaeota // Methanomicrobia // Methanosarcinales // Unclassified ANME-2a
	*Sample Distribution Key
	1 = #3731 14N T17d
	2 = #3731 14N T326d
	3 = #3731 15N T17d
	4 = #3731 15N T326d
	5 = #5133 14N T160d
	6 = #5133 15N T160d

## Sheet: SDF 4b
Supplementary Data File 4b: The sample distributions and phylogenetic assignments of relevant sulfur metabolism proteins detected in this study
Enzyme	Sample Distribution*	Metagenomic Database ORF	Phylogenetic Assignment of ORF
Sulfate adenylyltransferase (Sat)
	3	5133_contig_12976_1	Bacteria // Proteobacteria // Deltaproteobacteria // Desulfobacterales // Unclassified Desulfobacteraceae
	1,2,3,4,5	gi|158521019|ref|YP_001528889.1|	Bacteria // Proteobacteria // Deltaproteobacteria // Desulfobacterales // Desulfobacteraceae // Desulfococcus // Desulfococcus oleovorans
	5	gi|320353488|ref|YP_004194827.1|	Bacteria // Proteobacteria // Deltaproteobacteria // Desulfobacterales // Desulfobulbaceae // Desulfobulbus // Desulfobulbus propionicus
	3,5,6	gi|51245324|ref|YP_065208.1|	Bacteria // Proteobacteria // Deltaproteobacteria // Desulfobacterales // Desulfobulbaceae // Desulfotalea // Desulfotalea psychrophila
	1,2,3,5,6	5datasets_contig_596249_1	Bacteria // Proteobacteria // Deltaproteobacteria // Desulfovibrionales // Desulfovibrionaceae // Unclassified Desulfovibrio
	3,6	gi|328952464|ref|YP_004369798.1|	Bacteria // Proteobacteria // Deltaproteobacteria // Syntrophobacterales // Syntrophaceae // Desulfobacca // Desulfobacca acetoxidans
	1,2,3,5,6	gi|116748488|ref|YP_845175.1|	Bacteria // Proteobacteria // Deltaproteobacteria // Syntrophobacterales // Syntrophobacteraceae // Syntrophobacter // Syntrophobacter fumaroxidans
	1,2,3,4,6	5datasets_contig_424850_2	Bacteria // Proteobacteria // Unclassified Deltaproteobacteria
	1,2,3,4,5,6	3datasets_contig_73412_1	Bacteria // Proteobacteria // Unclassified Deltaproteobacteria
	1,2,3,4,5,6	3datasets_contig_50240_2	Unclassified Bacteria
	1,2,3,4,5,6	3datasets_contig_95175_2	Unclassified Bacteria
	1,3	3730_contig_12435_3	Unclassified Bacteria
	1,2,3,4,5,6	5133_contig_69983_1	Unclassified Bacteria
	1,2,3,4,5,6	5datasets_contig_223977_2	Unclassified Bacteria
	1,3,5,6	5datasets_contig_60040_1	Unclassified Bacteria
	1,2,5,6	3datasets_contig_55873_4	Unclassified Bacteria
	1,2,3,4,5,6	3datasets_contig_55873_5	Unclassified Bacteria
Adenylylsulfate reductase, subunit A (AprA)
	1,3,5,6	gi|206889584|ref|YP_002249623.1|	Bacteria // Nitrospirae // Nitrospira // Nitrospirales // Nitrospiraceae // Thermodesulfovibrio // Thermodesulfovibrio yellowstonii
	4	gi|218779417|ref|YP_002430735.1|	Bacteria // Proteobacteria // Deltaproteobacteria // Desulfobacterales // Desulfobacteraceae // Desulfatibacillum // Desulfatibacillum alkenivorans
	1,3,5	gi|158521015|ref|YP_001528885.1|	Bacteria // Proteobacteria // Deltaproteobacteria // Desulfobacterales // Desulfobacteraceae // Desulfococcus // Desulfococcus oleovorans
	1,3,5,6	gi|320352898|ref|YP_004194237.1|	Bacteria // Proteobacteria // Deltaproteobacteria // Desulfobacterales // Desulfobulbaceae // Desulfobulbus // Desulfobulbus propionicus
	1,2,3,4,5,6	gi|51244957|ref|YP_064841.1|	Bacteria // Proteobacteria // Deltaproteobacteria // Desulfobacterales // Desulfobulbaceae // Desulfotalea // Desulfotalea psychrophila
	1,2,3,4,5,6	5datasets_contig_13906_4	Bacteria // Proteobacteria // Deltaproteobacteria // Desulfobacterales // Unclassified Desulfobacteraceae
	1,2,3,4,5,6	5datasets_contig_57909_2	Bacteria // Proteobacteria // Deltaproteobacteria // Desulfobacterales // Unclassified Desulfobacteraceae
	1,2,3,4,5,6	5579_contig_29833_6	Bacteria // Proteobacteria // Deltaproteobacteria // Desulfobacterales // Unclassified Desulfobacteraceae
	1,2,3,4,5,6	5datasets_contig_26551_6	Bacteria // Proteobacteria // Deltaproteobacteria // Desulfobacterales // Unclassified Desulfobacteraceae
	1,2,4,5	gi|242277707|ref|YP_002989836.1|	Bacteria // Proteobacteria // Deltaproteobacteria // Desulfovibrionales // Desulfovibrionaceae // Desulfovibrio // Desulfovibrio salexigens
	1,2,3,4,5,6	gi|218887977|ref|YP_002437298.1|	Bacteria // Proteobacteria // Deltaproteobacteria // Desulfovibrionales // Desulfovibrionaceae // Desulfovibrio // Desulfovibrio vulgaris
	1,2,3,4,5,6	5datasets_contig_116345_3	Bacteria // Proteobacteria // Deltaproteobacteria // Desulfuromonadales // Unclassified Geobacteraceae
	1,2,3,4,5,6	5datasets_contig_116345_2	Bacteria // Proteobacteria // Deltaproteobacteria // Desulfuromonadales // Unclassified Geobacteraceae
	1,2,3,4,5,6	5datasets_contig_4406_5	Bacteria // Proteobacteria // Gammaproteobacteria // Chromatiales // Unclassified Chromatiaceae
	5	gi|343798215|gb|EGV16175.1|	Bacteria // Proteobacteria // Gammaproteobacteria // Chromatiales // Chromatiaceae // Thiocapsa // Thiocapsa marina
	1,3	gi|220933536|ref|YP_002512435.1|	Bacteria // Proteobacteria // Gammaproteobacteria // Chromatiales // Ectothiorhodospiraceae // Thioalkalivibrio // Thioalkalivibrio sulfidiphilus
	1,2,3,4,5,6	3730_contig_5656_13	Bacteria // Proteobacteria // Unclassified Deltaproteobacteria
	1,2,3,4,5,6	3datasets_contig_104241_2	Bacteria // Proteobacteria // Unclassified Deltaproteobacteria
	5,6	5datasets_contig_45854_3	Bacteria // Proteobacteria // Unclassified Deltaproteobacteria
	1,3,5,6	5datasets_contig_330714_3	Bacteria // Proteobacteria // Unclassified Deltaproteobacteria
	1,2,3,4,5,6	3datasets_contig_126776_1	Bacteria // Proteobacteria // Unclassified Deltaproteobacteria
	1,2,3,4,5,6	gi|93454939|gb|EAT05180.1|	Bacteria // Proteobacteria // Unclassified Deltaproteobacteria
	1,2,3,4,5,6	gi|300447112|gb|EFK10890.1|	Bacteria // Proteobacteria // Unclassified Deltaproteobacteria
	1,2,3,4,5,6	gi|492796121|ref|WP_005966055.1|	Bacteria // Proteobacteria // Unclassified Gammaproteobacteria
	1,2,3,4,5,6	3datasets_contig_51487_1	Bacteria // Unclassified Proteobacteria
	3,4,5,6	BCs_pro_contig_01484_1484_1	Unclassified Bacteria
	1,2,3,4,5,6	5datasets_contig_73328_4	Unclassified Bacteria
	5,6	5datasets_contig_89166_2	Unclassified Bacteria
	1,2,3,4,5,6	5datasets_contig_51141_2	Unclassified Bacteria
	1,3,5,6	5133_contig_13768_2	Unclassified Bacteria
	1,2,3,4,5,6	3datasets_contig_182965_2	Unclassified Bacteria
	5,6	5datasets_contig_506040_3	Unclassified Bacteria
	1,2,3,4,5,6	3datasets_contig_9454_1	Unclassified Bacteria
	1,2,3,4,5,6	3730_contig_12952_2	Unclassified Bacteria
	1,2,3,4,5,6	5579_contig_7188_2	Unclassified Bacteria
	1,2,3,4,5,6	5133_contig_10584_3	Unclassified Bacteria
	1,2,3,4,5,6	3datasets_contig_21196_3	Unclassified Bacteria
Adenylylsulfate reductase, subunit B (AprB)
	1,6	5datasets_contig_13906_5	Bacteria // Proteobacteria // Deltaproteobacteria // Desulfobacterales // Unclassified Desulfobacteraceae
	5	5datasets_contig_226737_1	Bacteria // Proteobacteria // Deltaproteobacteria // Desulfobacterales // Unclassified Desulfobacteraceae
	5	5datasets_contig_153044_2	Bacteria // Proteobacteria // Unclassified Gammaproteobacteria
	3,5,6	5datasets_contig_40236_1	Bacteria // Proteobacteria // Unclassified Gammaproteobacteria
	1,2,3,4,5,6	3730_contig_5656_11	Unclassified Bacteria
	1,2,3,5,6	VO1_contig_117068_1	Unclassified Bacteria
	5	5datasets_contig_26685_2	Unclassified Bacteria
	1,3,5,6	3730_contig_27505_3	Unclassified Bacteria
	1,5,6	5579_contig_78572_2	Unclassified Bacteria
	1,2,3,4,5,6	3730_contig_12952_3	Unclassified Bacteria
	3,5	3730_contig_44452_1	Unclassified Bacteria
	3,5,6	3datasets_contig_48177_1	Unclassified Bacteria
	1,3,5,6	3datasets_contig_5395_2	Unclassified Bacteria
Sulfite reductase, subunit A (DsrA)
	1,2,3,4,5,6	5579_contig_10734_2	Bacteria // Proteobacteria // Deltaproteobacteria // Desulfobacterales // Unclassified Desulfobacteraceae
	1,2,3,4,5,6	5datasets_contig_185184_3	Bacteria // Proteobacteria // Unclassified Deltaproteobacteria
	1,2,3,5	5133_contig_27137_1	Bacteria // Proteobacteria // Unclassified Deltaproteobacteria
	1,2,3,4,5,6	3datasets_contig_55689_4	Bacteria // Proteobacteria // Unclassified Deltaproteobacteria
	1,2,5,6	5133_contig_4763_1	Unclassified Bacteria
	1,2,3,4,5,6	5datasets_contig_644447_2	Unclassified Bacteria
	1,2,3,4,5,6	3datasets_contig_40304_2	Unclassified Bacteria
	1,2,3,4,5,6	3datasets_contig_36700_2	Unclassified Bacteria
	1,2,3,4,5,6	3730_contig_4924_2	Unclassified Bacteria
	1,3,5,6	5133_contig_12134_2	Unclassified Bacteria
	4,5	3datasets_contig_51332_1	Unclassified Bacteria
Sulfite reductase, subunit B (DsrB)
	1,2,3,4,5,6	5datasets_contig_185184_5	Bacteria // Proteobacteria // Unclassified Deltaproteobacteria
	1,2,3,4,5,6	3datasets_contig_40304_3	Bacteria // Proteobacteria // Unclassified Deltaproteobacteria
	1,2,3,4,5,6	5datasets_contig_44821_3	Bacteria // Proteobacteria // Unclassified Deltaproteobacteria
	2,3,4,5,6	5133_contig_279_21	Bacteria // Proteobacteria // Deltaproteobacteria // Desulfobacterales // Unclassified Desulfobacteraceae
	1,2,3,4,5,6	5datasets_contig_20382_7	Bacteria // Proteobacteria // Deltaproteobacteria // Desulfobacterales // Unclassified Desulfobacteraceae
	1,3	gi|224371295|ref|YP_002605459.1|	Bacteria // Proteobacteria // Deltaproteobacteria // Desulfobacterales // Desulfobacteraceae // Desulfobacterium // Desulfobacterium autotrophicum
	2,4,5,6	gi|158522680|ref|YP_001530550.1|	Bacteria // Proteobacteria // Deltaproteobacteria // Desulfobacterales // Desulfobacteraceae // Desulfococcus // Desulfococcus oleovorans
	1,5,6	gi|51244650|ref|YP_064534.1|	Bacteria // Proteobacteria // Deltaproteobacteria // Desulfobacterales // Desulfobulbaceae // Desulfotalea // Desulfotalea psychrophila
	1,3,5,6	gi|242278264|ref|YP_002990393.1|	Bacteria // Proteobacteria // Deltaproteobacteria // Desulfovibrionales // Desulfovibrionaceae // Desulfovibrio // Desulfovibrio salexigens
	6	5datasets_contig_106599_6	Bacteria // Proteobacteria // Gammaproteobacteria // Chromatiales // Unclassified Chromatiaceae
	1,2,3,4,5,6	5datasets_contig_204529_2	Unclassified Bacteria
	1,2,3,4,5,6	5datasets_contig_213014_2	Unclassified Bacteria
	1,2,3,4,5,6	5133_contig_27137_2	Unclassified Bacteria
	1,2,3,4,5,6	5datasets_contig_177529_2	Unclassified Bacteria
	2,3,4,5,6	3730_contig_21108_2	Unclassified Bacteria
	2,3,4,5,6	3datasets_contig_238911_2	Unclassified Bacteria
	2,4,5,6	5datasets_contig_13575_2	Unclassified Bacteria
	1,2,3,4,5,6	5datasets_contig_177529_3	Unclassified Bacteria
Sulfide:quinone oxidoreductase (Sqr)
	1,5,6	5133_contig_2196_2	Bacteria // Proteobacteria // Epsilonproteobacteria // Unclassified Campylobacterales
	5	5579_contig_7838_11	Bacteria // Proteobacteria // Unclassified Epsilonproteobacteria
	5,6	3datasets_contig_15852_1	Bacteria // Proteobacteria // Unclassified Epsilonproteobacteria
Thiosulfate reductase
	1,4,5,6	5datasets_contig_62508_6	Bacteria // Proteobacteria // Deltaproteobacteria // Desulfobacterales // Unclassified Desulfobacteraceae
	5	5datasets_contig_178367_2	Unclassified Bacteria
	2,5,6	3datasets_contig_82717_4	Unclassified Bacteria
	5,6	5datasets_contig_371320_2	Unclassified Bacteria
	1,2,3,4,5,6	5datasets_contig_49489_2	Unclassified Bacteria
	1,3,5,6	3730_contig_594_6	Unclassified Bacteria
	5,6	3730_contig_6906_3	Unclassified Bacteria
Sulfite oxidase
	5,6	gi|152991645|ref|YP_001357366.1|	Bacteria // Proteobacteria // Epsilonproteobacteria // Sulfurovum // Sulfurovum NBC37-1
Sulfur oxidizing protein (SoxY)
	1,5	5133_contig_1494_2	Unclassified Bacteria
	*Sample Distribution Key
	1 = #3731 14N T17d
	2 = #3731 14N T326d
	3 = #3731 15N T17d
	4 = #3731 15N T326d
	5 = #5133 14N T160d
	6 = #5133 15N T160d

## Sheet: SDF 4c
	Supplementary Data File 4c: Order-level phylogenetic affiliations of sulfate reduction pathway enzymes detected in the cumulative proteome, given in percentage by enzyme.
		Sat	AprA	AprB	DsrA	DsrB
	Unclassified Proteobacteria	0	2.7	0	0	0
	Proteobacteria // Betaproteobacteria // Hydrogenophilales	0	5.4	0	0	0
	Proteobacteria // Deltaproteobacteria // Desulfobacterales	17.6	18.9	15.4	9.1	33.3
	Proteobacteria // Deltaproteobacteria // Desulfovibrionales	5.9	5.4	0	0	5.6
	Proteobacteria // Deltaproteobacteria // Desulfuromonadales	0	5.4	0	0	0
	Proteobacteria // Deltaproteobacteria // Syntrophobacterales	11.8	0	0	0	0
	Proteobacteria // Gammaproteobacteria // Chromatiales	0	8.1	7.7	9.1	5.6
	Proteobacteria // Unclassified Deltaproteobacteria	11.8	16.2	0	18.2	11.1
	Proteobacteria // Unclassified Gammaproteobacteria	0	2.7	15.4	0	0
	Nitrospirae // Nitrospira // Nitrospirales	0	2.7	0	0	0
	Unclassified Bacteria	52.9	32.5	61.5	63.6	44.4
